# Supplementary material for: The transcriptomic response of cells to a drug combination is more than the sum of the responses to the monotherapies
Source: eLife. 2020 Sep 18;9:e52707. doi: 10.7554/eLife.52707 (PMC7546737; doi:10.7554/eLife.52707)
Supplement: Supplementary file 1. — Actual values of negative inhibition in monotherapies are included in the heatmap at left. Monotherapy inhibition values used to calculate EOB are shown in the table at right (i.e. Drug1_NPI). [file elife-52707-supp1.xlsx]

## Sheet: 12 Hours
Drug1	Drug1Conc	Drug1_NPI	Drug2	Drug2Conc	Drug2_NPI	Sci_WellID	PredictedInhibition	ObservedInhibition	Comb_NPI_StdDev	Excess Over BLISS	Excess Over BLISS Error	Excess Over BLISS Error Percent
									0					Tamoxifen (uM)			Excess Over BLISS
Tamoxifen	40	88.6	Mefloquine	40	100	B3	100	100	0	0	0	0		40	-24.9	-27.3	-12.7	-17.3	0.5	8.1	8.8	7.4	2.1	0		65
Tamoxifen	40	88.6	Mefloquine	24.96	81.4	B4	97.872	100	0	2.1	2.0807	97.758		30	-21.7	-18	-21.8	-21.4	-10.2	17.8	35.8	31	8.8	0
Tamoxifen	40	88.6	Mefloquine	15.04	35.1	B5	92.588	100	0.0063273	7.4	4.9882	67.343		20	-4.5	10.8	0.6	20.8	18.4	29.6	41.7	50	14.8	0
Tamoxifen	40	88.6	Mefloquine	10	21.8	B6	91.072	99.9	0.060487	8.8	5.8661	66.336		10	-4.7	4.9	-1.8	4.1	2.3	9.2	35.2	48.1	16.3	0
Tamoxifen	40	88.6	Mefloquine	4.96	2.8	B7	88.894	97	0.78632	8.1	7.3108	89.738		4.96	1.4	5.1	-0.4	0.1	5.4	6.9	10.3	45.2	17.2	0
Tamoxifen	40	88.6	Mefloquine	3.04	0	B8	88.579	89.1	3.7619	0.5	7.8101	1484.2		3.04	-1.4	-4.6	0.7	-1.1	3.7	8.3	-3.3	30.3	16.8	0
Tamoxifen	40	88.6	Mefloquine	2	0	B9	88.579	71.2	10.944	-17.3	9.8044	56.547		2	-4.7	7.2	-4.5	-2.5	1.5	11.9	-6.9	25.4	13.3	0
Tamoxifen	40	88.6	Mefloquine	1.52	0	B10	88.579	75.9	8.7622	-12.7	9.0538	71.432		0.96	-3.8	-5.6	-7.8	-8.1	-7.5	-3.8	-6.8	1.1	9.3	0
Tamoxifen	40	88.6	Mefloquine	0.72	0	B11	88.579	61.3	11.441	-27.3	10.001	36.671		0.5	-7	-4.2	-6.6	2.6	0.8	4.9	-6.4	6.1	10.3	0
Tamoxifen	40	88.6	Mefloquine	0.5	0	B12	88.579	63.6	18.319	-24.9	12.965	51.976		0.248	0.9	-0.8	-2.8	-1.5	-5.5	-1.5	-12	-6.3	4.3	0		-45
Tamoxifen	30	51.6	Mefloquine	40	100	C3	100	100	0	0	0	0			0.5	0.72	1.52	2	3.04	4.96	10	15.04	24.96	40
Tamoxifen	30	51.6	Mefloquine	24.96	81.4	C4	90.975	99.8	0.048962	8.8	7.1263	80.674			Mefloquine (uM)
Tamoxifen	30	51.6	Mefloquine	15.04	35.1	C5	68.572	99.6	0.11254	31	10.921	35.194
Tamoxifen	30	51.6	Mefloquine	10	21.8	C6	62.14	98	1.7145	35.8	11.979	33.425		Tamoxifen (uM)			Observed % Inhibition
Tamoxifen	30	51.6	Mefloquine	4.96	2.8	C7	52.907	70.7	5.1998	17.8	15.152	85.328		40	88.6	63.6	61.3	75.9	71.2	89.1	97	99.9	100	100	100		100
Tamoxifen	30	51.6	Mefloquine	3.04	0	C8	51.572	41.4	4.1614	-10.2	15.447	151.81		30	51.6	29.9	33.5	29.8	30.1	41.4	70.7	98	99.6	99.8	100
Tamoxifen	30	51.6	Mefloquine	2	0	C9	51.572	30.1	4.6334	-21.4	15.445	72.068		20	19	14.5	29.8	19.6	39.8	37.4	50.8	78.4	97.4	99.7	100
Tamoxifen	30	51.6	Mefloquine	1.52	0	C10	51.572	29.8	3.9514	-21.8	15.486	70.967		10	10.7	6	15.6	8.9	14.8	13	22.4	65.3	90.2	99.7	100
Tamoxifen	30	51.6	Mefloquine	0.72	0	C11	51.572	33.5	7.5964	-18	15.94	88.323		4.96	0.5	1.9	5.6	0.1	0.6	5.9	10.1	32.5	80.6	98.7	100
Tamoxifen	30	51.6	Mefloquine	0.5	0	C12	51.572	29.9	12.616	-21.7	16.877	77.739		3.04	-2.2077	-1.4	-4.6	0.7	-1.1	3.7	11.1	18.5	65.4	98.2	100
Tamoxifen	20	19	Mefloquine	40	100	D3	100	100	0	0	0	0		2	5.0933	0.4	12.3	0.6	2.6	6.6	19.6	18.9	63.8	95.6	100
Tamoxifen	20	19	Mefloquine	24.96	81.4	D4	84.905	99.7	0.12428	14.8	11.112	74.91		0.96	-3.1787	-3.8	-5.6	-7.8	-8.1	-7.5	-1	15	36.2	90.7	100
Tamoxifen	20	19	Mefloquine	15.04	35.1	D5	47.437	97.4	3.2816	50	10.581	21.18		0.5	-0.8955	-7	-4.2	-6.6	2.6	0.8	7.7	15.4	41.2	91.6	100
Tamoxifen	20	19	Mefloquine	10	21.8	D6	36.679	78.4	26.673	41.7	17.577	42.152		0.248	-2.3619	0.9	-0.8	-2.8	-1.5	-5.5	1.2	9.8	28.8	85.7	100		-45
Tamoxifen	20	19	Mefloquine	4.96	2.8	D7	21.238	50.8	27.848	29.6	19.23	65.075		0		-0.96054	-6.0316	-4.2616	-1.2471	-3.8477	2.8	21.8	35.1	81.4	100
Tamoxifen	20	19	Mefloquine	3.04	0	D8	19.004	37.4	25.061	18.4	18.051	98.009			0	0.5	0.72	1.52	2	3.04	4.96	10	15.04	24.96	40
Tamoxifen	20	19	Mefloquine	2	0	D9	19.004	39.8	25.118	20.8	17.964	86.428			Mefloquine (uM)
Tamoxifen	20	19	Mefloquine	1.52	0	D10	19.004	19.6	11.236	0.6	12.787	2041
Tamoxifen	20	19	Mefloquine	0.72	0	D11	19.004	29.8	18.25	10.8	15.268	141.9
Tamoxifen	20	19	Mefloquine	0.5	0	D12	19.004	14.5	10.446	-4.5	12.241	274.22
Tamoxifen	10	10.7	Mefloquine	40	100	E3	100	100	0	0	0	0
Tamoxifen	10	10.7	Mefloquine	24.96	81.4	E4	83.356	99.7	0.13335	16.3	12.074	73.856
Tamoxifen	10	10.7	Mefloquine	15.04	35.1	E5	42.043	90.2	10.63	48.1	10.804	22.454
Tamoxifen	10	10.7	Mefloquine	10	21.8	E6	30.182	65.3	17.13	35.2	10.423	29.651
Tamoxifen	10	10.7	Mefloquine	4.96	2.8	E7	13.156	22.4	10.312	9.2	7.2415	78.657
Tamoxifen	10	10.7	Mefloquine	3.04	0	E8	10.693	13	5.2172	2.3	5.0578	220.98
Tamoxifen	10	10.7	Mefloquine	2	0	E9	10.693	14.8	5.2532	4.1	4.5555	110.68
Tamoxifen	10	10.7	Mefloquine	1.52	0	E10	10.693	8.9	6.7263	-1.8	6.1328	349.09
Tamoxifen	10	10.7	Mefloquine	0.72	0	E11	10.693	15.6	3.043	4.9	5.14	104.74
Tamoxifen	10	10.7	Mefloquine	0.5	0	E12	10.693	6	7.5679	-4.7	5.6534	119.34
Tamoxifen	4.96	0.5	Mefloquine	40	100	F3	100	100	0	0	0	0
Tamoxifen	4.96	0.5	Mefloquine	24.96	81.4	F4	81.46	98.7	1.1432	17.2	13.497	78.285
Tamoxifen	4.96	0.5	Mefloquine	15.04	35.1	F5	35.439	80.6	10.142	45.2	11.936	26.417
Tamoxifen	4.96	0.5	Mefloquine	10	21.8	F6	22.226	32.5	11.4	10.3	8.4478	82.283
Tamoxifen	4.96	0.5	Mefloquine	4.96	2.8	F7	3.26	10.1	1.2228	6.9	6.6487	96.865
Tamoxifen	4.96	0.5	Mefloquine	3.04	0	F8	0.51624	5.9	8.4108	5.4	8.2456	152.17
Tamoxifen	4.96	0.5	Mefloquine	2	0	F9	0.51624	0.6	11.128	0.1	8.9183	9555.7
Tamoxifen	4.96	0.5	Mefloquine	1.52	0	F10	0.51624	0.1	10.238	-0.4	9.3178	2361.2
Tamoxifen	4.96	0.5	Mefloquine	0.72	0	F11	0.51624	5.6	5.526	5.1	7.9409	155
Tamoxifen	4.96	0.5	Mefloquine	0.5	0	F12	0.51624	1.9	2.8275	1.4	6.5238	472.63
Tamoxifen	3.04	0	Mefloquine	40	100	G3	100	100	0	0	0	0
Tamoxifen	3.04	0	Mefloquine	24.96	81.4	G4	81.364	98.2	0.8889	16.8	13.519	80.367
Tamoxifen	3.04	0	Mefloquine	15.04	35.1	G5	35.104	65.4	16.152	30.3	13.523	44.652
Tamoxifen	3.04	0	Mefloquine	10	21.8	G6	21.822	18.5	4.7378	-3.3	4.0462	123.33
Tamoxifen	3.04	0	Mefloquine	4.96	2.8	G7	2.758	11.1	7.0713	8.3	5.5446	66.821
Tamoxifen	3.04	0	Mefloquine	3.04	0	G8	0	3.7	8.5906	3.7	6.1363	165.08
Tamoxifen	3.04	0	Mefloquine	2	0	G9	0	-1.1	1.9037	-1.1	2.8372	253.8
Tamoxifen	3.04	0	Mefloquine	1.52	0	G10	0	0.7	12.459	0.7	8.5056	1224.8
Tamoxifen	3.04	0	Mefloquine	0.72	0	G11	0	-4.6	4.2969	-4.6	5.2693	114.46
Tamoxifen	3.04	0	Mefloquine	0.5	0	G12	0	-1.4	5.3317	-1.4	4.2388	299.94
Tamoxifen	2	5.1	Mefloquine	40	100	H3	100	100	0	0	0	0
Tamoxifen	2	5.1	Mefloquine	24.96	81.4	H4	82.313	95.6	5.0808	13.3	13.189	99.285
Tamoxifen	2	5.1	Mefloquine	15.04	35.1	H5	38.409	63.8	7.7059	25.4	10.854	42.766
Tamoxifen	2	5.1	Mefloquine	10	21.8	H6	25.804	18.9	6.6929	-6.9	6.3096	91.557
Tamoxifen	2	5.1	Mefloquine	4.96	2.8	H7	7.7108	19.6	7.3555	11.9	7.5377	63.24
Tamoxifen	2	5.1	Mefloquine	3.04	0	H8	5.0933	6.6	10.758	1.5	8.8285	603.38
Tamoxifen	2	5.1	Mefloquine	2	0	H9	5.0933	2.6	13.64	-2.5	9.787	396.98
Tamoxifen	2	5.1	Mefloquine	1.52	0	H10	5.0933	0.6	10.596	-4.5	9.1427	203.49
Tamoxifen	2	5.1	Mefloquine	0.72	0	H11	5.0933	12.3	13.578	7.2	10.417	143.77
Tamoxifen	2	5.1	Mefloquine	0.5	0	H12	5.0933	0.4	9.1626	-4.7	7.9524	170.4
Tamoxifen	0.96	0	Mefloquine	40	100	I3	100	100	0	0	0	0
Tamoxifen	0.96	0	Mefloquine	24.96	81.4	I4	81.364	90.7	11.111	9.3	14.997	161.41
Tamoxifen	0.96	0	Mefloquine	15.04	35.1	I5	35.104	36.2	31.245	1.1	20.896	1860.2
Tamoxifen	0.96	0	Mefloquine	10	21.8	I6	21.822	15	9.3766	-6.8	7.7728	113.71
Tamoxifen	0.96	0	Mefloquine	4.96	2.8	I7	2.758	-1	9.1806	-3.8	8.7492	231.83
Tamoxifen	0.96	0	Mefloquine	3.04	0	I8	0	-7.5	3.6279	-7.5	7.3347	98.033
Tamoxifen	0.96	0	Mefloquine	2	0	I9	0	-8.1	7.2245	-8.1	7.7843	96.272
Tamoxifen	0.96	0	Mefloquine	1.52	0	I10	0	-7.8	10.127	-7.8	9.547	122.42
Tamoxifen	0.96	0	Mefloquine	0.72	0	I11	0	-5.6	13.989	-5.6	11.099	197.18
Tamoxifen	0.96	0	Mefloquine	0.5	0	I12	0	-3.8	1.9331	-3.8	6.7893	180.74
Tamoxifen	0.5	0	Mefloquine	40	100	J3	100	100	0	0	0	0
Tamoxifen	0.5	0	Mefloquine	24.96	81.4	J4	81.364	91.6	9.8152	10.3	14.664	142.6
Tamoxifen	0.5	0	Mefloquine	15.04	35.1	J5	35.104	41.2	14.021	6.1	12.896	212.44
Tamoxifen	0.5	0	Mefloquine	10	21.8	J6	21.822	15.4	1.1428	-6.4	4.0482	62.781
Tamoxifen	0.5	0	Mefloquine	4.96	2.8	J7	2.758	7.7	5.7702	4.9	6.0084	121.71
Tamoxifen	0.5	0	Mefloquine	3.04	0	J8	0	0.8	4.7543	0.8	5.6697	736.51
Tamoxifen	0.5	0	Mefloquine	2	0	J9	0	2.6	1.7965	2.6	4.4129	171.87
Tamoxifen	0.5	0	Mefloquine	1.52	0	J10	0	-6.6	8.2611	-6.6	7.4101	112.28
Tamoxifen	0.5	0	Mefloquine	0.72	0	J11	0	-4.2	1.3629	-4.2	5.8126	137.91
Tamoxifen	0.5	0	Mefloquine	0.5	0	J12	0	-7	7.1034	-7	6.0719	86.713																							-21.7	-24.9
Tamoxifen	0.248	0	Mefloquine	40	100	K3	100	100	0	0	0	0																							-18	-27.3
Tamoxifen	0.248	0	Mefloquine	24.96	81.4	K4	81.364	85.7	16.189	4.3	16.424	382.44																							-21.8	-12.7
Tamoxifen	0.248	0	Mefloquine	15.04	35.1	K5	35.104	28.8	10.097	-6.3	11.34	179.61																							-21.4	-17.3
Tamoxifen	0.248	0	Mefloquine	10	21.8	K6	21.822	9.8	8.0375	-12	5.3431	44.557																							-10.2	0.5
Tamoxifen	0.248	0	Mefloquine	4.96	2.8	K7	2.758	1.2	4.4748	-1.5	4.2249	276.35																							17.8	8.1
Tamoxifen	0.248	0	Mefloquine	3.04	0	K8	0	-5.5	3.0673	-5.5	3.6227	65.54																							35.8	8.8
Tamoxifen	0.248	0	Mefloquine	2	0	K9	0	-1.5	7.435	-1.5	4.7119	313.22																							31	7.4
Tamoxifen	0.248	0	Mefloquine	1.52	0	K10	0	-2.8	8.1113	-2.8	6.2825	227.57																							8.8	2.1
Tamoxifen	0.248	0	Mefloquine	0.72	0	K11	0	-0.8	0.83285	-0.8	4.3331	525.54																							0	0
Tamoxifen	0.248	0	Mefloquine	0.5	0	K12	0	0.9	8.7921	0.9	5.585	616.23

## Sheet: 24 Hours
Drug1	Drug1Conc	Drug1_NPI	Drug2	Drug2Conc	Drug2_NPI	Sci_WellID	PredictedInhibition	ObservedInhibition	Comb_NPI_StdDev	Excess Over BLISS	Excess Over BLISS Error	Excess Over BLISS Error Percent		Tamoxifen (uM)			Excess Over BLISS
Tamoxifen	40	100	Mefloquine	40	100	B3	100	100	8.2046e-15	0	4.737e-15	0		40	-1	-0.2	-0.5	-0.3	-0.1	0	0	0	0	0		65
Tamoxifen	40	100	Mefloquine	24.96	99.7	B4	100	100	8.2046e-15	0	4.737e-15	33.334		30	-8.9	-10.3	2.1	-1.5	2.2	3.4	2.5	0	0	0
Tamoxifen	40	100	Mefloquine	15.04	91.9	B5	100	100	8.2046e-15	0	4.7526e-15	0		20	-17.9	-15.6	3.5	9.4	31.1	48.8	33.1	5.2	0.2	0
Tamoxifen	40	100	Mefloquine	10	48.3	B6	100	100	8.2046e-15	0	5.332e-15	0		10	0.4	1.3	6.7	-3	1.9	8.4	27.6	6	0.2	0
Tamoxifen	40	100	Mefloquine	4.96	11.8	B7	100	100	8.2046e-15	0	6.3154e-15	0		4.96	6.3	-0.2	0	0.7	0.8	-0.1	15	2	-0.1	0
Tamoxifen	40	100	Mefloquine	3.04	7.6	B8	100	99.9	0.10474	-0.1	0.060471	81.65		3.04	5.9	2.6	7.6	-0.9	-0.1	-5.1	-9.6	-10.2	-0.7	0
Tamoxifen	40	100	Mefloquine	2	1.2	B9	100	99.7	0.39211	-0.3	0.22638	81.65		2	6.6	-1.2	12.5	-0.2	2.2	-6.4	-12.9	-17.9	0.1	0
Tamoxifen	40	100	Mefloquine	1.52	1.8	B10	100	99.5	0.64097	-0.5	0.37006	81.65		0.96	-6.7	0.8	4	-1.8	-7.6	-9.5	-20.2	-28.5	-1.2	0
Tamoxifen	40	100	Mefloquine	0.72	0	B11	100	99.8	0.23587	-0.2	0.13618	81.65		0.5	-7.6	-4.2	-1.7	4	-8	-6.1	-11.1	-8.8	0.1	0
Tamoxifen	40	100	Mefloquine	0.5	0	B12	100	99	1.4031	-1	0.81007	81.65		0.248	-0.2	-3	-5.6	-2	-7.8	-4.5	-14.3	-8.9	0.3	0		-45
Tamoxifen	30	95	Mefloquine	40	100	C3	100	100	8.2046e-15	0	4.743e-15	0			0.5	0.72	1.52	2	3.04	4.96	10	15.04	24.96	40
Tamoxifen	30	95	Mefloquine	24.96	99.7	C4	99.983	100	0.0028249	0	0.0089411	59.562			Mefloquine (uM)
Tamoxifen	30	95	Mefloquine	15.04	91.9	C5	99.589	99.5	0.56996	0	0.37828	836.17
Tamoxifen	30	95	Mefloquine	10	48.3	C6	97.393	99.9	0.028167	2.5	1.0008	39.301		Tamoxifen (uM)			Observed % Inhibition
Tamoxifen	30	95	Mefloquine	4.96	11.8	C7	95.552	99	0.81066	3.4	1.6602	48.379		40	100	99	99.8	99.5	99.7	99.9	100	100	100	100	100		100
Tamoxifen	30	95	Mefloquine	3.04	7.6	C8	95.341	97.6	0.92846	2.2	1.7859	79.478		30	95	86.1	84.7	97.2	93.5	97.6	99	99.9	99.5	100	100
Tamoxifen	30	95	Mefloquine	2	1.2	C9	95.015	93.5	4.9392	-1.5	3.364	228.66		20	34.7	16.8	19.1	39.3	44.8	70.8	91.3	99.3	99.9	100	100
Tamoxifen	30	95	Mefloquine	1.52	1.8	C10	95.048	97.2	1.2889	2.1	1.9421	91.645		10	16.1	16.4	17.4	24.3	14.1	24.4	34.5	84.3	99.1	99.9	100
Tamoxifen	30	95	Mefloquine	0.72	0	C11	94.956	84.7	12.779	-10.3	7.5963	73.808		4.96	1.5	7.8	1.3	3.3	3.3	9.8	13	64.1	93.9	99.6	100
Tamoxifen	30	95	Mefloquine	0.5	0	C12	94.956	86.1	8.9099	-8.9	5.4507	61.529		3.04	-5.835	5.9	2.6	9.4	0.2	7.5	6.7	38.8	81.7	99	100
Tamoxifen	20	34.7	Mefloquine	40	100	D3	100	100	8.2046e-15	0	5.6579e-15	39.814		2	0.13773	6.7	-1	14.4	1.1	10	5.6	35.5	74	99.7	100
Tamoxifen	20	34.7	Mefloquine	24.96	99.7	D4	99.785	100	0.0039804	0.2	0.084616	49.272		0.96	-0.32341	-6.7	0.8	5.8	-0.6	0	2.3	28.2	63.3	98.4	100
Tamoxifen	20	34.7	Mefloquine	15.04	91.9	D5	94.683	99.9	0.01902	5.2	1.516	28.941		0.5	-3.7256	-7.6	-4.2	0.1	5.2	-0.4	5.7	37.2	83.1	99.8	100
Tamoxifen	20	34.7	Mefloquine	10	48.3	D6	66.246	99.3	0.29581	33.1	5.0291	15.211		0.248	-3.1948	-0.2	-3	-3.8	-0.8	-0.1	7.3	34	82.9	100	100		-45
Tamoxifen	20	34.7	Mefloquine	4.96	11.8	D7	42.405	91.3	1.3506	48.8	3.2817	6.7183		0		-0.061182	-2.1997	1.8	1.2	7.6	11.8	48.3	91.9	99.7	100
Tamoxifen	20	34.7	Mefloquine	3.04	7.6	D8	39.667	70.8	8.5904	31.1	7.4502	23.933			0	0.5	0.72	1.52	2	3.04	4.96	10	15.04	24.96	40
Tamoxifen	20	34.7	Mefloquine	2	1.2	D9	35.44	44.8	7.2896	9.4	5.466	58.45			Mefloquine (uM)
Tamoxifen	20	34.7	Mefloquine	1.52	1.8	D10	35.869	39.3	11.205	3.5	8.1581	234.77
Tamoxifen	20	34.7	Mefloquine	0.72	0	D11	34.681	19.1	4.1722	-15.6	4.405	28.319
Tamoxifen	20	34.7	Mefloquine	0.5	0	D12	34.681	16.8	5.8601	-17.9	4.6795	26.198
Tamoxifen	10	16.1	Mefloquine	40	100	E3	100	100	8.2046e-15	0	6.1837e-15	0
Tamoxifen	10	16.1	Mefloquine	24.96	99.7	E4	99.723	99.9	0.018118	0.2	0.10959	51.18
Tamoxifen	10	16.1	Mefloquine	15.04	91.9	E5	93.169	99.1	0.41506	6	1.9766	33.134
Tamoxifen	10	16.1	Mefloquine	10	48.3	E6	56.638	84.3	9.3916	27.6	8.5664	31.022
Tamoxifen	10	16.1	Mefloquine	4.96	11.8	E7	26.011	34.5	5.1544	8.4	5.6825	67.334
Tamoxifen	10	16.1	Mefloquine	3.04	7.6	E8	22.492	24.4	12.794	1.9	10.625	554.98
Tamoxifen	10	16.1	Mefloquine	2	1.2	E9	17.063	14.1	12.658	-3	9.0474	306.25
Tamoxifen	10	16.1	Mefloquine	1.52	1.8	E10	17.614	24.3	14.092	6.7	10.734	161.39
Tamoxifen	10	16.1	Mefloquine	0.72	0	E11	16.088	17.4	4.7217	1.3	6.201	461.66
Tamoxifen	10	16.1	Mefloquine	0.5	0	E12	16.088	16.4	8.7871	0.4	7.1804	2050
Tamoxifen	4.96	1.5	Mefloquine	40	100	F3	100	100	8.2046e-15	0	6.6497e-15	0
Tamoxifen	4.96	1.5	Mefloquine	24.96	99.7	F4	99.675	99.6	0.23598	-0.1	0.18637	293.4
Tamoxifen	4.96	1.5	Mefloquine	15.04	91.9	F5	91.98	93.9	3.7291	2	3.1303	159.92
Tamoxifen	4.96	1.5	Mefloquine	10	48.3	F6	49.089	64.1	1.2864	15	7.4448	49.582
Tamoxifen	4.96	1.5	Mefloquine	4.96	11.8	F7	13.13	13	3.3663	-0.1	4.396	3255.3
Tamoxifen	4.96	1.5	Mefloquine	3.04	7.6	F8	8.9988	9.8	8.9611	0.8	9.422	1140.6
Tamoxifen	4.96	1.5	Mefloquine	2	1.2	F9	2.6246	3.3	4.3669	0.7	4.9517	689.18
Tamoxifen	4.96	1.5	Mefloquine	1.52	1.8	F10	3.2708	3.3	6.0761	0	7.689	46104
Tamoxifen	4.96	1.5	Mefloquine	0.72	0	F11	1.4792	1.3	5.5299	-0.2	5.6036	3554.8
Tamoxifen	4.96	1.5	Mefloquine	0.5	0	F12	1.4792	7.8	5.9629	6.3	5.0883	80.637
Tamoxifen	3.04	0	Mefloquine	40	100	G3	100	100	8.2046e-15	0	6.6991e-15	0
Tamoxifen	3.04	0	Mefloquine	24.96	99.7	G4	99.67	99	0.79334	-0.7	0.4758	70.651
Tamoxifen	3.04	0	Mefloquine	15.04	91.9	G5	91.859	81.7	10.591	-10.2	6.5321	64.095
Tamoxifen	3.04	0	Mefloquine	10	48.3	G6	48.324	38.8	3.8807	-9.6	7.735	80.927
Tamoxifen	3.04	0	Mefloquine	4.96	11.8	G7	11.826	6.7	5.3171	-5.1	4.5196	88.428
Tamoxifen	3.04	0	Mefloquine	3.04	7.6	G8	7.6325	7.5	2.9445	-0.1	7.8275	5358.4
Tamoxifen	3.04	0	Mefloquine	2	1.2	G9	1.1626	0.2	8.1659	-0.9	5.8855	637.33
Tamoxifen	3.04	0	Mefloquine	1.52	1.8	G10	1.8185	9.4	2.4881	7.6	6.639	87.493
Tamoxifen	3.04	0	Mefloquine	0.72	0	G11	0	2.6	9.6619	2.6	6.8203	262.04
Tamoxifen	3.04	0	Mefloquine	0.5	0	G12	0	5.9	4.0887	5.9	3.6859	62.42
Tamoxifen	2	0.1	Mefloquine	40	100	H3	100	100	8.2046e-15	0	6.6944e-15	0
Tamoxifen	2	0.1	Mefloquine	24.96	99.7	H4	99.671	99.7	0.15515	0.1	0.15669	230.08
Tamoxifen	2	0.1	Mefloquine	15.04	91.9	H5	91.871	74	10.29	-17.9	6.3677	35.544
Tamoxifen	2	0.1	Mefloquine	10	48.3	H6	48.395	35.5	8.4718	-12.9	8.8434	68.661
Tamoxifen	2	0.1	Mefloquine	4.96	11.8	H7	11.947	5.6	6.1371	-6.4	4.7359	74.5
Tamoxifen	2	0.1	Mefloquine	3.04	7.6	H8	7.7597	10	14.897	2.2	11.445	518.16
Tamoxifen	2	0.1	Mefloquine	2	1.2	H9	1.2987	1.1	6.1071	-0.2	4.8404	2154.3
Tamoxifen	2	0.1	Mefloquine	1.52	1.8	H10	1.9537	14.4	7.0255	12.5	7.549	60.485
Tamoxifen	2	0.1	Mefloquine	0.72	0	H11	0.13773	-1	6.3471	-1.2	5.2319	453.55
Tamoxifen	2	0.1	Mefloquine	0.5	0	H12	0.13773	6.7	16.264	6.6	9.7338	147.7
Tamoxifen	0.96	0	Mefloquine	40	100	I3	100	100	8.2046e-15	0	6.6991e-15	0
Tamoxifen	0.96	0	Mefloquine	24.96	99.7	I4	99.67	98.4	1.9707	-1.2	1.145	91.951
Tamoxifen	0.96	0	Mefloquine	15.04	91.9	I5	91.859	63.3	12.696	-28.5	7.6797	26.904
Tamoxifen	0.96	0	Mefloquine	10	48.3	I6	48.324	28.2	7.2774	-20.2	8.4395	41.848
Tamoxifen	0.96	0	Mefloquine	4.96	11.8	I7	11.826	2.3	6.0734	-9.5	4.4372	46.784
Tamoxifen	0.96	0	Mefloquine	3.04	7.6	I8	7.6325	0	17.326	-7.6	12.429	163.5
Tamoxifen	0.96	0	Mefloquine	2	1.2	I9	1.1626	-0.6	3.7343	-1.8	3.539	200.02
Tamoxifen	0.96	0	Mefloquine	1.52	1.8	I10	1.8185	5.8	7.1391	4	7.3842	184.48
Tamoxifen	0.96	0	Mefloquine	0.72	0	I11	0	0.8	6.8872	0.8	5.1544	623.81
Tamoxifen	0.96	0	Mefloquine	0.5	0	I12	0	-6.7	7.3711	-6.7	4.6349	68.899
Tamoxifen	0.5	0	Mefloquine	40	100	J3	100	100	8.2046e-15	0	6.6991e-15	0
Tamoxifen	0.5	0	Mefloquine	24.96	99.7	J4	99.67	99.8	0.13299	0.1	0.15036	146.56
Tamoxifen	0.5	0	Mefloquine	15.04	91.9	J5	91.859	83.1	6.0658	-8.8	4.1972	47.964
Tamoxifen	0.5	0	Mefloquine	10	48.3	J6	48.324	37.2	10.515	-11.1	9.7299	87.485
Tamoxifen	0.5	0	Mefloquine	4.96	11.8	J7	11.826	5.7	5.6407	-6.1	5.5105	90.216
Tamoxifen	0.5	0	Mefloquine	3.04	7.6	J8	7.6325	-0.4	7.4617	-8	9.3031	115.61
Tamoxifen	0.5	0	Mefloquine	2	1.2	J9	1.1626	5.2	9.0566	4	7.1242	178.08
Tamoxifen	0.5	0	Mefloquine	1.52	1.8	J10	1.8185	0.1	2.3653	-1.7	7.3983	439.63
Tamoxifen	0.5	0	Mefloquine	0.72	0	J11	0	-4.2	2.2534	-4.2	5.3249	127.64
Tamoxifen	0.5	0	Mefloquine	0.5	0	J12	0	-7.6	7.6652	-7.6	6.2339	81.637
Tamoxifen	0.248	0	Mefloquine	40	100	K3	100	100	8.2046e-15	0	6.6991e-15	0
Tamoxifen	0.248	0	Mefloquine	24.96	99.7	K4	99.67	100	8.2046e-15	0.3	0.1287	39.039
Tamoxifen	0.248	0	Mefloquine	15.04	91.9	K5	91.859	82.9	8.1954	-8.9	5.2583	58.838
Tamoxifen	0.248	0	Mefloquine	10	48.3	K6	48.324	34	15.194	-14.3	11.451	79.891
Tamoxifen	0.248	0	Mefloquine	4.96	11.8	K7	11.826	7.3	2.0807	-4.5	3.2498	72.267
Tamoxifen	0.248	0	Mefloquine	3.04	7.6	K8	7.6325	-0.1	12.255	-7.8	10.314	132.76
Tamoxifen	0.248	0	Mefloquine	2	1.2	K9	1.1626	-0.8	6.7006	-2	5.0009	253.94
Tamoxifen	0.248	0	Mefloquine	1.52	1.8	K10	1.8185	-3.8	9.3187	-5.6	8.2838	147.04
Tamoxifen	0.248	0	Mefloquine	0.72	0	K11	0	-3	9.4833	-3	6.5538	215.59
Tamoxifen	0.248	0	Mefloquine	0.5	0	K12	0	-0.2	9.5714	-0.2	6.0105	3805.6

## Sheet: 48 Hours
Drug1	Drug1Conc	Drug1_NPI	Drug2	Drug2Conc	Drug2_NPI	Sci_WellID	PredictedInhibition	ObservedInhibition	Comb_NPI_StdDev	Excess Over BLISS	Excess Over BLISS Error	Excess Over BLISS Error Percent
														Tamoxifen (uM)			Excess Over BLISS
Tamoxifen	40	99.8	Mefloquine	40	100	B3	100	100	0	0	0	0		40	0.1	0.2	0.2	0.2	0.2	0.2	0.1	0	0	0		65
Tamoxifen	40	99.8	Mefloquine	24.96	99.9	B4	100	100	0	0	0.00020609	91.321		30	8.3	6.9	9	8.9	9.4	9	4	0.2	0	0
Tamoxifen	40	99.8	Mefloquine	15.04	97.4	B5	99.994	100	0	0	0.0055525	88.925		20	6	6.6	16.7	24.5	36.2	41.8	20.4	1.4	0	0
Tamoxifen	40	99.8	Mefloquine	10	63.7	B6	99.912	100	0	0.1	0.073434	83.068		10	0.5	-5.9	-4.3	-5.8	-3.6	15	21.6	1.6	0	0
Tamoxifen	40	99.8	Mefloquine	4.96	17.5	B7	99.799	100	0	0.2	0.16418	81.69		4.96	1.5	0.5	-3	0.9	-7.6	4.7	15.4	1.8	0.1	0
Tamoxifen	40	99.8	Mefloquine	3.04	11.1	B8	99.783	100	0	0.2	0.17699	81.728		3.04	2.4	4.7	-5.4	0.4	-3.8	4.5	1.9	1	0	0
Tamoxifen	40	99.8	Mefloquine	2	7.9	B9	99.776	100	0	0.2	0.18309	81.677		2	-0.3	0.1	-1.3	7.7	-5.1	0.2	-8.2	-0.2	0	0
Tamoxifen	40	99.8	Mefloquine	1.52	8.4	B10	99.777	100	0	0.2	0.18214	81.691		0.96	-14.1	-9.9	-15.1	-5.6	-16	-15.2	-24.7	-1.5	-0.1	0
Tamoxifen	40	99.8	Mefloquine	0.72	6.1	B11	99.771	100	0	0.2	0.1868	81.707		0.5	-0.5	-9	-10	-6.6	-5.6	-6.1	-13.1	-0.4	0	0
Tamoxifen	40	99.8	Mefloquine	0.5	0	B12	99.757	99.9	0.15529	0.1	0.21812	163.15		0.248	-2.9	-7.3	-12.7	-10.7	-9.9	-10.4	-13	-2.7	0.1	0		-45
Tamoxifen	30	89	Mefloquine	40	100	C3	100	100	0	0	0	0			0.5	0.72	1.52	2	3.04	4.96	10	15.04	24.96	40
Tamoxifen	30	89	Mefloquine	24.96	99.9	C4	99.99	100	0.001986	0	0.0090698	197.59			Mefloquine (uM)
Tamoxifen	30	89	Mefloquine	15.04	97.4	C5	99.719	100	0.037729	0.2	0.24294	102.61
Tamoxifen	30	89	Mefloquine	10	63.7	C6	96.018	100	0.0035687	4	3.184	80.372		Tamoxifen (uM)			Observed % Inhibition
Tamoxifen	30	89	Mefloquine	4.96	17.5	C7	90.947	99.9	0.030582	9	7.109	79.301		40	99.8	99.9	100	100	100	100	100	100	100	100	100		100
Tamoxifen	30	89	Mefloquine	3.04	11.1	C8	90.245	99.7	0.13106	9.4	7.6644	81.435		30	89	97.3	96.6	99	98.8	99.7	99.9	100	100	100	100
Tamoxifen	30	89	Mefloquine	2	7.9	C9	89.902	98.8	0.80585	8.9	7.9416	88.987		20	43.4	49.3	53.5	64.9	72.3	85.8	95.1	99.8	100	100	100
Tamoxifen	30	89	Mefloquine	1.52	8.4	C10	89.956	99	0.45519	9	7.8913	87.329		10	33.1	33.6	31.3	34.4	32.7	36.9	59.8	97.3	99.9	100	100
Tamoxifen	30	89	Mefloquine	0.72	6.1	C11	89.701	96.6	2.1699	6.9	8.1853	118.55		4.96	16	17.5	21.6	20.1	23.6	17.7	35.4	84.9	99.7	100	100
Tamoxifen	30	89	Mefloquine	0.5	0	C12	89.031	97.3	1.1813	8.3	8.6366	104.1		3.04	10	12.4	20.2	12.2	17.6	16.2	30.3	69.2	98.6	99.9	100
Tamoxifen	20	43.4	Mefloquine	40	100	D3	100	100	0	0	0	0		2	10.2	9.9	15.7	16.5	25	15	26	59.2	97.5	99.9	100
Tamoxifen	20	43.4	Mefloquine	24.96	99.9	D4	99.948	100	0.0014287	0	0.023811	59.519		0.96	15.3	1.3	10.6	7.4	16.5	8.7	14.9	44.6	96.3	99.8	100
Tamoxifen	20	43.4	Mefloquine	15.04	97.4	D5	98.548	100	0.011875	1.4	0.58525	41.079		0.5	7	6.5	3.7	4.9	7.8	11.7	17.2	53.1	97.2	99.9	100
Tamoxifen	20	43.4	Mefloquine	10	63.7	D6	79.446	99.8	0.094964	20.4	5.1081	25.079		0.248	5.6	2.7	4.1	0.9	2.4	6.1	11.7	52.7	94.9	100	100		-45
Tamoxifen	20	43.4	Mefloquine	4.96	17.5	D7	53.271	95.1	5.7522	41.8	9.8126	23.453		0		-1.8649	6.1	8.4	7.9	11.1	17.5	63.7	97.4	99.9	100
Tamoxifen	20	43.4	Mefloquine	3.04	11.1	D8	49.648	85.8	8.9435	36.2	11.279	31.169			0	0.5	0.72	1.52	2	3.04	4.96	10	15.04	24.96	40
Tamoxifen	20	43.4	Mefloquine	2	7.9	D9	47.879	72.3	13.974	24.5	13.061	53.415			Mefloquine (uM)
Tamoxifen	20	43.4	Mefloquine	1.52	8.4	D10	48.158	64.9	15.434	16.7	13.579	81.241
Tamoxifen	20	43.4	Mefloquine	0.72	6.1	D11	46.842	53.5	9.7945	6.6	11.962	180.58
Tamoxifen	20	43.4	Mefloquine	0.5	0	D12	43.385	49.3	14.685	6	13.982	234.63
Tamoxifen	10	33.1	Mefloquine	40	100	E3	100	100	0	0	0	0
Tamoxifen	10	33.1	Mefloquine	24.96	99.9	E4	99.938	100	0.0047935	0	0.026359	61.883
Tamoxifen	10	33.1	Mefloquine	15.04	97.4	E5	98.285	99.9	0.072672	1.6	0.63302	39.306
Tamoxifen	10	33.1	Mefloquine	10	63.7	E6	75.719	97.3	3.5957	21.6	4.9889	23.146
Tamoxifen	10	33.1	Mefloquine	4.96	17.5	E7	44.798	59.8	12.155	15	9.2958	61.989
Tamoxifen	10	33.1	Mefloquine	3.04	11.1	E8	40.518	36.9	7.0259	-3.6	7.8614	215.39
Tamoxifen	10	33.1	Mefloquine	2	7.9	E9	38.428	32.7	4.762	-5.8	7.2796	126.51
Tamoxifen	10	33.1	Mefloquine	1.52	8.4	E10	38.759	34.4	8.9282	-4.3	8.5074	195.83
Tamoxifen	10	33.1	Mefloquine	0.72	6.1	E11	37.204	31.3	2.2757	-5.9	7.1357	121.75
Tamoxifen	10	33.1	Mefloquine	0.5	0	E12	33.119	33.6	12.152	0.5	10.081	2181.6
Tamoxifen	4.96	16	Mefloquine	40	100	F3	100	100	0	0	0	0
Tamoxifen	4.96	16	Mefloquine	24.96	99.9	F4	99.922	100	0.0093281	0.1	0.032498	63.041
Tamoxifen	4.96	16	Mefloquine	15.04	97.4	F5	97.846	99.7	0.24429	1.8	0.77838	42.959
Tamoxifen	4.96	16	Mefloquine	10	63.7	F6	69.511	84.9	12.128	15.4	8.5349	55.478
Tamoxifen	4.96	16	Mefloquine	4.96	17.5	F7	30.685	35.4	13.747	4.7	8.7746	188.02
Tamoxifen	4.96	16	Mefloquine	3.04	11.1	F8	25.311	17.7	1.5716	-7.6	4.5311	59.539
Tamoxifen	4.96	16	Mefloquine	2	7.9	F9	22.686	23.6	5.9813	0.9	5.2977	600.77
Tamoxifen	4.96	16	Mefloquine	1.52	8.4	F10	23.101	20.1	5.8372	-3	5.3553	179.42
Tamoxifen	4.96	16	Mefloquine	0.72	6.1	F11	21.148	21.6	3.4391	0.5	4.8765	1008.4
Tamoxifen	4.96	16	Mefloquine	0.5	0	F12	16.02	17.5	6.3787	1.5	5.5409	367.47
Tamoxifen	3.04	10	Mefloquine	40	100	G3	100	100	0	0	0	0
Tamoxifen	3.04	10	Mefloquine	24.96	99.9	G4	99.917	99.9	0.052287	0	0.045683	7638.4
Tamoxifen	3.04	10	Mefloquine	15.04	97.4	G5	97.693	98.6	0.47145	1	0.86259	90.203
Tamoxifen	3.04	10	Mefloquine	10	63.7	G6	67.331	69.2	8.6734	1.9	7.2014	386.28
Tamoxifen	3.04	10	Mefloquine	4.96	17.5	G7	25.729	30.3	3.21	4.5	4.0752	89.847
Tamoxifen	3.04	10	Mefloquine	3.04	11.1	G8	19.971	16.2	8.4788	-3.8	6.5746	174.48
Tamoxifen	3.04	10	Mefloquine	2	7.9	G9	17.159	17.6	7.6384	0.4	5.863	1426.3
Tamoxifen	3.04	10	Mefloquine	1.52	8.4	G10	17.603	12.2	7.6738	-5.4	5.9958	111.35
Tamoxifen	3.04	10	Mefloquine	0.72	6.1	G11	15.511	20.2	3.3218	4.7	4.765	101.44
Tamoxifen	3.04	10	Mefloquine	0.5	0	G12	10.016	12.4	5.3394	2.4	4.9928	211.36
Tamoxifen	2	10.2	Mefloquine	40	100	H3	100	100	0	0	0	0
Tamoxifen	2	10.2	Mefloquine	24.96	99.9	H4	99.917	99.9	0.10038	0	0.067259	275.96
Tamoxifen	2	10.2	Mefloquine	15.04	97.4	H5	97.696	97.5	2.316	-0.2	1.5654	1041.4
Tamoxifen	2	10.2	Mefloquine	10	63.7	H6	67.386	59.2	7.7316	-8.2	6.7501	82.063
Tamoxifen	2	10.2	Mefloquine	4.96	17.5	H7	25.855	26	9.2527	0.2	6.0172	3494.1
Tamoxifen	2	10.2	Mefloquine	3.04	11.1	H8	20.106	15	1.5705	-5.1	3.6989	73.13
Tamoxifen	2	10.2	Mefloquine	2	7.9	H9	17.299	25	14.067	7.7	8.6052	111.51
Tamoxifen	2	10.2	Mefloquine	1.52	8.4	H10	17.742	16.5	1.2225	-1.3	3.1695	248.61
Tamoxifen	2	10.2	Mefloquine	0.72	6.1	H11	15.653	15.7	15.411	0.1	9.5427	13100
Tamoxifen	2	10.2	Mefloquine	0.5	0	H12	10.168	9.9	3.296	-0.3	3.3138	1249.9
Tamoxifen	0.96	15.3	Mefloquine	40	100	I3	100	100	0	0	0	0
Tamoxifen	0.96	15.3	Mefloquine	24.96	99.9	I4	99.922	99.8	0.16501	-0.1	0.10054	77.297
Tamoxifen	0.96	15.3	Mefloquine	15.04	97.4	I5	97.829	96.3	1.5586	-1.5	1.1815	78.584
Tamoxifen	0.96	15.3	Mefloquine	10	63.7	I6	69.267	44.6	9.5032	-24.7	7.2446	29.361
Tamoxifen	0.96	15.3	Mefloquine	4.96	17.5	I7	30.131	14.9	7.6149	-15.2	4.9144	32.339
Tamoxifen	0.96	15.3	Mefloquine	3.04	11.1	I8	24.714	8.7	5.1333	-16	4.2302	26.428
Tamoxifen	0.96	15.3	Mefloquine	2	7.9	I9	22.069	16.5	8.351	-5.6	5.287	94.183
Tamoxifen	0.96	15.3	Mefloquine	1.52	8.4	I10	22.487	7.4	7.1115	-15.1	4.7843	31.684
Tamoxifen	0.96	15.3	Mefloquine	0.72	6.1	I11	20.519	10.6	8.8	-9.9	5.8144	58.629
Tamoxifen	0.96	15.3	Mefloquine	0.5	0	I12	15.35	1.3	6.0857	-14.1	3.9954	28.377
Tamoxifen	0.5	7	Mefloquine	40	100	J3	100	100	0	0	0	0
Tamoxifen	0.5	7	Mefloquine	24.96	99.9	J4	99.914	99.9	0.019308	0	0.037074	136.85
Tamoxifen	0.5	7	Mefloquine	15.04	97.4	J5	97.616	97.2	0.5631	-0.4	0.90403	237.91
Tamoxifen	0.5	7	Mefloquine	10	63.7	J6	66.248	53.1	9.102	-13.1	7.4493	56.875
Tamoxifen	0.5	7	Mefloquine	4.96	17.5	J7	23.266	17.2	6.8478	-6.1	5.0992	84.062
Tamoxifen	0.5	7	Mefloquine	3.04	11.1	J8	17.317	11.7	4.9825	-5.6	4.955	88.877
Tamoxifen	0.5	7	Mefloquine	2	7.9	J9	14.411	7.8	9.5887	-6.6	6.48	98.683
Tamoxifen	0.5	7	Mefloquine	1.52	8.4	J10	14.87	4.9	6.6595	-10	5.2596	52.719
Tamoxifen	0.5	7	Mefloquine	0.72	6.1	J11	12.709	3.7	10.608	-9	7.2831	80.766
Tamoxifen	0.5	7	Mefloquine	0.5	0	J12	7.0316	6.5	4.6972	-0.5	4.29	827.14
Tamoxifen	0.248	5.6	Mefloquine	40	100	K3	100	100	0	0	0	0
Tamoxifen	0.248	5.6	Mefloquine	24.96	99.9	K4	99.913	100	0	0.1	0.035957	41.102
Tamoxifen	0.248	5.6	Mefloquine	15.04	97.4	K5	97.58	94.9	3.2156	-2.7	2.0453	76.676
Tamoxifen	0.248	5.6	Mefloquine	10	63.7	K6	65.732	52.7	3.2449	-13	5.735	43.974
Tamoxifen	0.248	5.6	Mefloquine	4.96	17.5	K7	22.095	11.7	3.1915	-10.4	4.1739	40.23
Tamoxifen	0.248	5.6	Mefloquine	3.04	11.1	K8	16.054	6.1	8.1645	-9.9	6.5475	65.986
Tamoxifen	0.248	5.6	Mefloquine	2	7.9	K9	13.105	2.4	10.113	-10.7	7.0661	66.235
Tamoxifen	0.248	5.6	Mefloquine	1.52	8.4	K10	13.571	0.9	2.1147	-12.7	4.3443	34.175
Tamoxifen	0.248	5.6	Mefloquine	0.72	6.1	K11	11.376	4.1	7.7212	-7.3	6.3405	86.607
Tamoxifen	0.248	5.6	Mefloquine	0.5	0	K12	5.6124	2.7	5.5884	-2.9	5.1668	175.64

## Sheet: monotherapies
12Hrs					24Hrs					48Hrs
DRUG	CONCENTRATION uM	INHIBITION	STDEV		DRUG	CONCENTRATION uM	INHIBITION	STDEV		DRUG	CONCENTRATION uM	INHIBITION	STDEV
Tamoxifen	40	88.579	12.981		Tamoxifen	40	100	8.2e-15		Tamoxifen	40	99.757	0.34435
Tamoxifen	30	51.572	26.318		Tamoxifen	30	94.956	3.1213		Tamoxifen	30	89.031	14.91
Tamoxifen	20	19.004	18.248		Tamoxifen	20	34.681	5.5897		Tamoxifen	20	43.385	19.212
Tamoxifen	10	10.693	5.4327		Tamoxifen	10	16.088	8.7911		Tamoxifen	10	33.119	12.443
Tamoxifen	4.96	0.51624	10.412		Tamoxifen	4.96	1.4792	6.4708		Tamoxifen	4.96	16.02	6.9071
Tamoxifen	3.04	-2.2077	3.7516		Tamoxifen	3.04	-5.835	4.8774		Tamoxifen	3.04	10.016	6.4819
Tamoxifen	2	5.0933	9.7722		Tamoxifen	2	0.13773	4.4143		Tamoxifen	2	10.168	4.2232
Tamoxifen	0.96	-3.1787	11.097		Tamoxifen	0.96	-0.32341	3.1404		Tamoxifen	0.96	15.35	2.6617
Tamoxifen	0.5	-0.8955	6.9816		Tamoxifen	0.5	-3.7256	7.5879		Tamoxifen	0.5	7.0316	5.3479
Tamoxifen	0.248	-2.3619	2.2078		Tamoxifen	0.248	-3.1948	4.064		Tamoxifen	0.248	5.6124	6.646
Mefloquine	40	100	0		Mefloquine	40	100	8.2e-15		Mefloquine	40	100	0
Mefloquine	24.96	81.364	23.389		Mefloquine	24.96	99.67	0.22251		Mefloquine	24.96	99.907	0.065658
Mefloquine	15.04	35.104	16.787		Mefloquine	15.04	91.859	3.959		Mefloquine	15.04	97.436	1.5646
Mefloquine	10	21.822	4.2505		Mefloquine	10	48.324	12.573		Mefloquine	10	63.695	9.6124
Mefloquine	4.96	2.758	5.3774		Mefloquine	4.96	11.826	3.8096		Mefloquine	4.96	17.462	3.6682
Mefloquine	3.04	-3.8477	5.009		Mefloquine	3.04	7.6325	12.444		Mefloquine	3.04	11.063	5.5067
Mefloquine	2	-1.2471	2.54		Mefloquine	2	1.1626	3.741		Mefloquine	2	7.9379	3.3653
Mefloquine	1.52	-4.2616	6.9094		Mefloquine	1.52	1.8185	10.154		Mefloquine	1.52	8.4317	4.1185
Mefloquine	0.72	-6.0316	7.1246		Mefloquine	0.72	-2.1997	4.7338		Mefloquine	0.72	6.1065	4.9749
Mefloquine	0.5	-0.96054	3.3767		Mefloquine	0.5	-0.061182	0.50179		Mefloquine	0.5	-1.8649	2.2938
