# Supplementary material for: The transcriptomic response of cells to a drug combination is more than the sum of the responses to the monotherapies
Source: eLife. 2020 Sep 18;9:e52707. doi: 10.7554/eLife.52707 (PMC7546737; doi:10.7554/eLife.52707)
Supplement: Supplementary file 2. — Actual values of negative inhibition in monotherapies are included in the heatmap at left. Monotherapy inhibition values used to calculate EOB are shown in the table at right (i.e. Drug1_NPI). [file elife-52707-supp2.xlsx]

## Sheet: 12 Hours
Drug1	Drug1Conc	Drug1_NPI	Drug2	Drug2Conc	Drug2_NPI	Sci_WellID	PredictedInhibition	ObservedInhibition	Comb_NPI_StdDev	Excess Over BLISS	Excess Over BLISS Error	Excess Over BLISS Error Percent
									Comb_NPI_StdDev																	65
Tamoxifen	40	88.6	Withaferin A	40	86.3	B13	98.431	100	0	1.6	1.0536	67.164		Tamoxifen (uM)			Excess Over BLISS
Tamoxifen	40	88.6	Withaferin A	30	85.1	B14	98.293	100	0	1.7	1.1233	65.801		40	-19.8	-15.3	-17.7	-8.7	-0.3	8.5	4.8	3	1.7	1.6
Tamoxifen	40	88.6	Withaferin A	20	73.7	B15	96.996	100	0	3	2	66.586		30	-16.7	-19.3	-20.9	-28.5	-23.1	22.3	17.6	11.7	7.1	6.6
Tamoxifen	40	88.6	Withaferin A	10	57.6	B16	95.153	100	0.011279	4.8	3.2559	67.29		20	10	9.5	3	9.9	7.4	25.8	17.3	18.9	10.3	10.5
Tamoxifen	40	88.6	Withaferin A	4.96	0	B17	88.579	97.1	1.1953	8.5	7.6592	90.409		10	2.4	4.6	-0.1	-14	-18.5	-9.3	6.9	12.4	5.4	6.4
Tamoxifen	40	88.6	Withaferin A	3.04	0	B18	88.579	88.3	6.1906	-0.3	8.3269	3037.5		4.96	2.9	5.9	-4.6	-5.2	-28.6	-4.9	-2.1	8.5	0.2	3.7
Tamoxifen	40	88.6	Withaferin A	2	0	B19	88.579	79.8	1.6593	-8.7	7.556	86.46		3.04	4.4	10.3	-3.8	-5.7	-20.8	-29.3	-22.6	1.2	-4.9	1.7
Tamoxifen	40	88.6	Withaferin A	0.96	0	B20	88.579	70.9	7.2206	-17.7	8.5777	48.523		2	0.2	9.5	-7.5	-9.6	-33	-15.7	-18.7	-0.2	-6.4	-0.4
Tamoxifen	40	88.6	Withaferin A	0.5	0	B21	88.579	73.3	5.4514	-15.3	8.1354	53.295		0.96	4.5	-8.4	-6.5	-14	-33.9	-29.6	-20.9	-11.1	-7.1	-5.7
Tamoxifen	40	88.6	Withaferin A	0.248	8.3	B22	89.53	69.7	10.396	-19.8	9.1309	46.111		0.5	0.7	6.5	-8.6	-12.2	-30.2	-14.1	-11.8	-2.8	-6.4	-3		-45
Tamoxifen	30	51.6	Withaferin A	40	86.3	C13	93.348	99.9	0.070379	6.6	2.294	35		0.248	-1.1	1.5	-8.5	-23.2	-32.5	-23.2	-29.7	-3.3	-3.4	-2
Tamoxifen	30	51.6	Withaferin A	30	85.1	C14	92.761	99.8	0.067843	7.1	2.2983	32.539			0.248	0.5	0.96	2	3.04	4.96	10	20	30	40
Tamoxifen	30	51.6	Withaferin A	20	73.7	C15	87.264	99	0.70444	11.7	4.2657	36.314			Withaferin A (uM)
Tamoxifen	30	51.6	Withaferin A	10	57.6	C16	79.449	97.1	1.3841	17.6	7.1372	40.509
Tamoxifen	30	51.6	Withaferin A	4.96	0	C17	51.572	73.9	3.5162	22.3	16.47	73.691		Tamoxifen (uM)			Observed % Inhibition
Tamoxifen	30	51.6	Withaferin A	3.04	0	C18	51.572	28.5	8.0806	-23.1	16.115	69.799		40	88.6	69.7	73.3	70.9	79.8	88.3	97.1	100	100	100	100		100
Tamoxifen	30	51.6	Withaferin A	2	0	C19	51.572	23.1	10.252	-28.5	16.309	57.25		30	51.6	38.9	32.3	30.6	23.1	28.5	73.9	97.1	99	99.8	99.9
Tamoxifen	30	51.6	Withaferin A	0.96	0	C20	51.572	30.6	11.2	-20.9	16.528	78.984		20	19	35.7	28.5	22	28.9	26.4	44.8	82.9	97.6	98.2	99.3
Tamoxifen	30	51.6	Withaferin A	0.5	0	C21	51.572	32.3	9.9402	-19.3	16.301	84.539		10	10.7	20.6	15.3	10.5	-3.3	-7.8	1.4	69	88.9	92.1	94.2
Tamoxifen	30	51.6	Withaferin A	0.248	8.3	C22	55.603	38.9	4.1681	-16.7	14.225	85.312		4.96	0.5	11.7	6.4	-4.1	-4.7	-28.1	-4.4	55.7	82.3	85.3	90
Tamoxifen	20	19	Withaferin A	40	86.3	D13	88.875	99.3	0.47838	10.5	2.1683	20.705		3.04	-2.2077	12.7	10.3	-3.8	-5.7	-20.8	-29.3	35	74.9	80.1	88
Tamoxifen	20	19	Withaferin A	30	85.1	D14	87.893	98.2	1.855	10.3	1.9921	19.307		2	5.1	13.2	14.6	-2.4	-4.5	-27.9	-10.6	41.1	74.8	79.4	86.6
Tamoxifen	20	19	Withaferin A	20	73.7	D15	78.698	97.6	0.71964	18.9	3.6901	19.535		0.96	-3.1787	12.8	-8.4	-6.5	-14	-33.9	-29.6	36.7	62.6	77.9	80.6
Tamoxifen	20	19	Withaferin A	10	57.6	D16	65.629	82.9	18.193	17.3	12.439	71.927		0.5	-0.8955	9	6.5	-8.6	-12.2	-30.2	-14.1	45.8	70.9	78.7	83.3
Tamoxifen	20	19	Withaferin A	4.96	0	D17	19.004	44.8	0.91715	25.8	14.583	56.437		0.248	-2.3619	7.2	1.5	-8.5	-23.2	-32.5	-23.2	27.9	70.4	81.6	84.2
Tamoxifen	20	19	Withaferin A	3.04	0	D18	19.004	26.4	32.96	7.4	22.199	299.26		0		8.3	-0.5544	-13.455	-9.4491	-22.411	-11.92	57.6	73.7	85.1	86.3
Tamoxifen	20	19	Withaferin A	2	0	D19	19.004	28.9	14.217	9.9	13.363	135.24			0	0.248	0.5	0.96	2	3.04	4.96	10	20	30	40		-45
Tamoxifen	20	19	Withaferin A	0.96	0	D20	19.004	22	11.451	3	12.491	413.73			Withaferin A (uM)
Tamoxifen	20	19	Withaferin A	0.5	0	D21	19.004	28.5	8.0176	9.5	11.739	123.74
Tamoxifen	20	19	Withaferin A	0.248	8.3	D22	25.747	35.7	7.3788	10	10.883	109.3
Tamoxifen	10	10.7	Withaferin A	40	86.3	E13	87.733	94.2	4.5948	6.4	3.2094	49.838
Tamoxifen	10	10.7	Withaferin A	30	85.1	E14	86.651	92.1	2.4662	5.4	1.6317	30.05
Tamoxifen	10	10.7	Withaferin A	20	73.7	E15	76.513	88.9	6.3042	12.4	4.576	36.989
Tamoxifen	10	10.7	Withaferin A	10	57.6	E16	62.102	69	11.365	6.9	8.6306	125.94
Tamoxifen	10	10.7	Withaferin A	4.96	0	E17	10.693	1.4	23.872	-9.3	17.974	193.16
Tamoxifen	10	10.7	Withaferin A	3.04	0	E18	10.693	-7.8	10.152	-18.5	8.256	44.668
Tamoxifen	10	10.7	Withaferin A	2	0	E19	10.693	-3.3	1.8761	-14	3.355	23.912
Tamoxifen	10	10.7	Withaferin A	0.96	0	E20	10.693	10.5	15.159	-0.1	9.3838	6329.1
Tamoxifen	10	10.7	Withaferin A	0.5	0	E21	10.693	15.3	3.7216	4.6	4.5816	100.3
Tamoxifen	10	10.7	Withaferin A	0.248	8.3	E22	18.128	20.6	5.4223	2.4	5.1573	211.79
Tamoxifen	4.96	0.5	Withaferin A	40	86.3	F13	86.335	90	0.44081	3.7	2.1366	57.555
Tamoxifen	4.96	0.5	Withaferin A	30	85.1	F14	85.129	85.3	2.2799	0.2	1.748	813.51
Tamoxifen	4.96	0.5	Withaferin A	20	73.7	F15	73.836	82.3	0.7542	8.5	3.3749	39.659
Tamoxifen	4.96	0.5	Withaferin A	10	57.6	F16	57.783	55.7	7.8927	-2.1	8.0052	380.46
Tamoxifen	4.96	0.5	Withaferin A	4.96	0	F17	0.51624	-4.4	6.437	-4.9	14.244	289.19
Tamoxifen	4.96	0.5	Withaferin A	3.04	0	F18	0.51624	-28.1	6.5394	-28.6	8.9514	31.3
Tamoxifen	4.96	0.5	Withaferin A	2	0	F19	0.51624	-4.7	4.4753	-5.2	6.5661	126.99
Tamoxifen	4.96	0.5	Withaferin A	0.96	0	F20	0.51624	-4.1	12.23	-4.6	9.3814	205.07
Tamoxifen	4.96	0.5	Withaferin A	0.5	0	F21	0.51624	6.4	11.381	5.9	9.3497	159.54
Tamoxifen	4.96	0.5	Withaferin A	0.248	8.3	F22	8.7979	11.7	3.7163	2.9	6.7494	232.14
Tamoxifen	3.04	0	Withaferin A	40	86.3	G13	86.264	88	1.1	1.7	2.0857	121.4
Tamoxifen	3.04	0	Withaferin A	30	85.1	G14	85.052	80.1	1.8553	-4.9	1.3315	27.039
Tamoxifen	3.04	0	Withaferin A	20	73.7	G15	73.7	74.9	8.4868	1.2	5.7554	473.72
Tamoxifen	3.04	0	Withaferin A	10	57.6	G16	57.564	35	11.678	-22.6	9.1375	40.501
Tamoxifen	3.04	0	Withaferin A	4.96	0	G17	0	-29.3	7.3031	-29.3	13.304	45.353
Tamoxifen	3.04	0	Withaferin A	3.04	0	G18	0	-20.8	4.5003	-20.8	6.4414	30.944
Tamoxifen	3.04	0	Withaferin A	2	0	G19	0	-5.7	13.263	-5.7	7.9771	139.69
Tamoxifen	3.04	0	Withaferin A	0.96	0	G20	0	-3.8	5.9334	-3.8	4.2969	112.33
Tamoxifen	3.04	0	Withaferin A	0.5	0	G21	0	10.3	8.6792	10.3	6.1641	59.89
Tamoxifen	3.04	0	Withaferin A	0.248	8.3	G22	8.3246	12.7	5.5752	4.4	4.9997	114.02
Tamoxifen	2	5.1	Withaferin A	40	86.3	H13	86.964	86.6	3.4482	-0.4	2.8353	689.13
Tamoxifen	2	5.1	Withaferin A	30	85.1	H14	85.814	79.4	2.9467	-6.4	2.0186	31.609
Tamoxifen	2	5.1	Withaferin A	20	73.7	H15	75.04	74.8	3.7443	-0.2	3.8463	1595.4
Tamoxifen	2	5.1	Withaferin A	10	57.6	H16	59.725	41.1	15.801	-18.7	11.066	59.29
Tamoxifen	2	5.1	Withaferin A	4.96	0	H17	5.0933	-10.6	6.8712	-15.7	13.666	87.216
Tamoxifen	2	5.1	Withaferin A	3.04	0	H18	5.0933	-27.9	16.414	-33	12.194	36.933
Tamoxifen	2	5.1	Withaferin A	2	0	H19	5.0933	-4.5	17.713	-9.6	11.691	122.29
Tamoxifen	2	5.1	Withaferin A	0.96	0	H20	5.0933	-2.4	13.509	-7.5	9.7211	128.98
Tamoxifen	2	5.1	Withaferin A	0.5	0	H21	5.0933	14.6	20.887	9.5	13.588	143.21
Tamoxifen	2	5.1	Withaferin A	0.248	8.3	H22	12.994	13.2	9.0978	0.2	7.9984	3238.2
Tamoxifen	0.96	0	Withaferin A	40	86.3	I13	86.264	80.6	5.4081	-5.7	3.7923	66.609
Tamoxifen	0.96	0	Withaferin A	30	85.1	I14	85.052	77.9	4.209	-7.1	2.7098	38.03
Tamoxifen	0.96	0	Withaferin A	20	73.7	I15	73.7	62.6	16.012	-11.1	9.8534	88.816
Tamoxifen	0.96	0	Withaferin A	10	57.6	I16	57.564	36.7	20.684	-20.9	13.682	65.484
Tamoxifen	0.96	0	Withaferin A	4.96	0	I17	0	-29.6	29.972	-29.6	22.249	75.273
Tamoxifen	0.96	0	Withaferin A	3.04	0	I18	0	-33.9	3.5918	-33.9	8.6832	25.595
Tamoxifen	0.96	0	Withaferin A	2	0	I19	0	-14	8.794	-14	8.1935	58.334
Tamoxifen	0.96	0	Withaferin A	0.96	0	I20	0	-6.5	3.5122	-6.5	6.87	105.68
Tamoxifen	0.96	0	Withaferin A	0.5	0	I21	0	-8.4	4.2655	-8.4	7.4369	88.802
Tamoxifen	0.96	0	Withaferin A	0.248	8.3	I22	8.3246	12.8	7.8454	4.5	8.1061	180.12
Tamoxifen	0.5	0	Withaferin A	40	86.3	J13	86.264	83.3	3.403	-3	2.8328	94.349
Tamoxifen	0.5	0	Withaferin A	30	85.1	J14	85.052	78.7	1.9928	-6.4	1.4858	23.251
Tamoxifen	0.5	0	Withaferin A	20	73.7	J15	73.7	70.9	5.1306	-2.8	4.3232	152.52
Tamoxifen	0.5	0	Withaferin A	10	57.6	J16	57.564	45.8	7.5812	-11.8	7.6992	65.509
Tamoxifen	0.5	0	Withaferin A	4.96	0	J17	0	-14.1	9.0185	-14.1	14.068	100.08
Tamoxifen	0.5	0	Withaferin A	3.04	0	J18	0	-30.2	10.582	-30.2	9.1445	30.329
Tamoxifen	0.5	0	Withaferin A	2	0	J19	0	-12.2	0.92475	-12.2	4.1036	33.669
Tamoxifen	0.5	0	Withaferin A	0.96	0	J20	0	-8.6	8.5907	-8.6	6.5486	76.392
Tamoxifen	0.5	0	Withaferin A	0.5	0	J21	0	6.5	5.2746	6.5	5.8066	88.898
Tamoxifen	0.5	0	Withaferin A	0.248	8.3	J22	8.3246	9	8.8346	0.7	7.0969	984.57
Tamoxifen	0.248	0	Withaferin A	40	86.3	K13	86.264	84.2	3.7022	-2	2.9082	143.11
Tamoxifen	0.248	0	Withaferin A	30	85.1	K14	85.052	81.6	3.8425	-3.4	2.3407	68.032
Tamoxifen	0.248	0	Withaferin A	20	73.7	K15	73.7	70.4	4.5076	-3.3	3.9594	121.35
Tamoxifen	0.248	0	Withaferin A	10	57.6	K16	57.564	27.9	39.6	-29.7	23.668	79.731
Tamoxifen	0.248	0	Withaferin A	4.96	0	K17	0	-23.2	10.092	-23.2	13.788	59.388
Tamoxifen	0.248	0	Withaferin A	3.04	0	K18	0	-32.5	2.7453	-32.5	5.847	17.99
Tamoxifen	0.248	0	Withaferin A	2	0	K19	0	-23.2	6.462	-23.2	3.9814	17.198
Tamoxifen	0.248	0	Withaferin A	0.96	0	K20	0	-8.5	3.2858	-8.5	2.6945	31.657
Tamoxifen	0.248	0	Withaferin A	0.5	0	K21	0	1.5	5.4366	1.5	4.4353	287.62
Tamoxifen	0.248	0	Withaferin A	0.248	8.3	K22	8.3246	7.2	6.634	-1.1	5.17	452.56

## Sheet: 24 Hours
Drug1	Drug1Conc	Drug1_NPI	Drug2	Drug2Conc	Drug2_NPI	Sci_WellID	PredictedInhibition	ObservedInhibition	Comb_NPI_StdDev	Excess Over BLISS	Excess Over BLISS Error	Excess Over BLISS Error Percent
																										65
Tamoxifen	40	100	Withaferin A	40	100	B13	100	100	8.2046e-15	0	4.737e-15	0		Tamoxifen (uM)			Excess Over BLISS
Tamoxifen	40	100	Withaferin A	30	99.5	B14	100	100	8.2046e-15	0	4.737e-15	0		40	-1.8	-2	-1.6	-0.3	-0.1	0	0	0	0	0
Tamoxifen	40	100	Withaferin A	20	95.9	B15	100	100	8.2046e-15	0	4.7409e-15	0		30	-17.8	-22.9	-14.8	-11.3	-0.9	3.7	1.2	0	0	0
Tamoxifen	40	100	Withaferin A	10	75.9	B16	100	100	8.2046e-15	0	4.8721e-15	0		20	6.9	-5.5	-2	1.5	33.1	60.8	15.2	2.3	0.3	0
Tamoxifen	40	100	Withaferin A	4.96	0	B17	100	100	8.2046e-15	0	6.6991e-15	0		10	7.7	-5.8	4.9	0.8	-25.2	15.1	10.4	2.3	0	0
Tamoxifen	40	100	Withaferin A	3.04	0	B18	100	99.9	0.092603	-0.1	0.053464	81.65		4.96	6.5	-2.7	3.9	0.4	-27.1	-6.6	6.8	1.3	-0.1	0
Tamoxifen	40	100	Withaferin A	2	0	B19	100	99.7	0.41087	-0.3	0.23722	81.65		3.04	3.3	-10.9	-1.1	-7.4	-27.1	-22.2	-0.5	-0.1	-0.3	-0.3
Tamoxifen	40	100	Withaferin A	0.96	0	B20	100	98.4	2.316	-1.6	1.3371	81.65		2	8.4	-11.5	2.9	-1.4	-29.9	-4	-1.2	0	-0.5	-0.1
Tamoxifen	40	100	Withaferin A	0.5	0	B21	100	98	2.7928	-2	1.6124	81.65		0.96	0.5	-8.4	-10.6	-4.3	-42.8	-24.6	-7.3	-1.1	-1	0
Tamoxifen	40	100	Withaferin A	0.248	0	B22	100	98.2	2.4771	-1.8	1.4301	81.65		0.5	-5	-9.9	-18.3	-11.4	-43	-18.1	-5.2	-1.1	-0.6	0		-45
Tamoxifen	30	95	Withaferin A	40	100	C13	100	100	0.0075409	0	0.0043538	57.294		0.248	5.1	-4.7	-15	-7.2	-35.2	-23.7	-8.1	-0.9	-1	0
Tamoxifen	30	95	Withaferin A	30	99.5	C14	99.974	100	0.0012913	0	0.011638	92.627			0.248	0.5	0.96	2	3.04	4.96	10	20	30	40
Tamoxifen	30	95	Withaferin A	20	95.9	C15	99.794	99.8	0.2158	0	0.15554	918.95			Withaferin A (uM)
Tamoxifen	30	95	Withaferin A	10	75.9	C16	98.787	100	0.0029539	1.2	0.47563	40.6
Tamoxifen	30	95	Withaferin A	4.96	0	C17	94.956	98.6	1.003	3.7	2.0966	57.316		Tamoxifen (uM)			Observed % Inhibition
Tamoxifen	30	95	Withaferin A	3.04	0	C18	94.956	94	7.1229	-0.9	4.52	480.78		40	100	98.2	98	98.4	99.7	99.9	100	100	100	100	100		100
Tamoxifen	30	95	Withaferin A	2	0	C19	94.956	83.6	16.23	-11.3	9.5429	84.178		30	95	77.2	72.1	80.1	83.6	94	98.6	100	99.8	100	100
Tamoxifen	30	95	Withaferin A	0.96	0	C20	94.956	80.1	19.51	-14.8	11.409	76.936		20	34.7	41.6	29.2	32.7	36.2	67.8	95.5	99.5	99.6	100	100
Tamoxifen	30	95	Withaferin A	0.5	0	C21	94.956	72.1	34.025	-22.9	19.727	86.299		10	16.1	23.8	10.2	21	16.9	-9.1	31.2	90.3	98.9	99.6	100
Tamoxifen	30	95	Withaferin A	0.248	0	C22	94.956	77.2	22.386	-17.8	13.052	73.457		4.96	1.5	8	-1.2	5.4	1.9	-25.7	-5.1	83.1	97.3	99.4	100
Tamoxifen	20	34.7	Withaferin A	40	100	D13	100	100	8.2046e-15	0	5.6579e-15	39.814		3.04	-5.835	3.3	-10.9	-1.1	-7.4	-27.1	-22.2	75.4	95.8	99.1	99.7
Tamoxifen	20	34.7	Withaferin A	30	99.5	D14	99.669	100	0.0052651	0.3	0.094218	32.529		2	0.13773	8.6	-11.3	3	-1.2	-29.8	-3.9	74.8	95.9	99	99.9
Tamoxifen	20	34.7	Withaferin A	20	95.9	D15	97.328	99.6	0.41899	2.3	0.78642	34.777		0.96	-0.32341	0.5	-8.4	-10.6	-4.3	-42.8	-24.6	68.6	94.9	98.5	100
Tamoxifen	20	34.7	Withaferin A	10	75.9	D16	84.287	99.5	0.059855	15.2	2.6505	17.466		0.5	-3.7256	-5	-9.9	-18.3	-11.4	-43	-18.1	70.7	94.8	98.9	100
Tamoxifen	20	34.7	Withaferin A	4.96	0	D17	34.681	95.5	3.0332	60.8	12.238	20.124		0.248	-3.1948	5.1	-4.7	-15	-7.2	-35.2	-23.7	67.8	95	98.5	100
Tamoxifen	20	34.7	Withaferin A	3.04	0	D18	34.681	67.8	16.313	33.1	12.024	36.294		0		-5.0791	-18.865	-7.8829	-19.975	-43.638	-14.709	75.9	95.9	99.5	100
Tamoxifen	20	34.7	Withaferin A	2	0	D19	34.681	36.2	14.176	1.5	8.9411	581.08			0	0.248	0.5	0.96	2	3.04	4.96	10	20	30	40		-45
Tamoxifen	20	34.7	Withaferin A	0.96	0	D20	34.681	32.7	10.922	-2	7.5437	383.07			Withaferin A (uM)
Tamoxifen	20	34.7	Withaferin A	0.5	0	D21	34.681	29.2	16.344	-5.5	9.9829	182.87
Tamoxifen	20	34.7	Withaferin A	0.248	0	D22	34.681	41.6	20.94	6.9	12.89	186.09
Tamoxifen	10	16.1	Withaferin A	40	100	E13	100	100	8.2046e-15	0	6.1837e-15	0
Tamoxifen	10	16.1	Withaferin A	30	99.5	E14	99.574	99.6	0.059395	0	0.12662	917.47
Tamoxifen	10	16.1	Withaferin A	20	95.9	E15	96.567	98.9	0.53912	2.3	1.0175	43.495
Tamoxifen	10	16.1	Withaferin A	10	75.9	E16	79.814	90.3	0.88849	10.4	3.5144	33.637
Tamoxifen	10	16.1	Withaferin A	4.96	0	E17	16.088	31.2	6.0404	15.1	16.212	107.53
Tamoxifen	10	16.1	Withaferin A	3.04	0	E18	16.088	-9.1	11.667	-25.2	12.09	47.942
Tamoxifen	10	16.1	Withaferin A	2	0	E19	16.088	16.9	12.52	0.8	9.0671	1143.4
Tamoxifen	10	16.1	Withaferin A	0.96	0	E20	16.088	21	9.469	4.9	8.1705	166.92
Tamoxifen	10	16.1	Withaferin A	0.5	0	E21	16.088	10.2	8.9715	-5.8	7.2745	124.39
Tamoxifen	10	16.1	Withaferin A	0.248	0	E22	16.088	23.8	10.424	7.7	8.8192	114.22
Tamoxifen	4.96	1.5	Withaferin A	40	100	F13	100	100	8.2046e-15	0	6.6497e-15	0
Tamoxifen	4.96	1.5	Withaferin A	30	99.5	F14	99.5	99.4	0.24948	-0.1	0.20167	216.28
Tamoxifen	4.96	1.5	Withaferin A	20	95.9	F15	95.969	97.3	0.45285	1.3	1.1515	86.028
Tamoxifen	4.96	1.5	Withaferin A	10	75.9	F16	76.3	83.1	6.3284	6.8	5.3633	78.484
Tamoxifen	4.96	1.5	Withaferin A	4.96	0	F17	1.4792	-5.1	6.6314	-6.6	18.403	279
Tamoxifen	4.96	1.5	Withaferin A	3.04	0	F18	1.4792	-25.7	9.8312	-27.1	12.232	45.069
Tamoxifen	4.96	1.5	Withaferin A	2	0	F19	1.4792	1.9	10.778	0.4	7.6464	1842.4
Tamoxifen	4.96	1.5	Withaferin A	0.96	0	F20	1.4792	5.4	5.2742	3.9	6.2084	158.8
Tamoxifen	4.96	1.5	Withaferin A	0.5	0	F21	1.4792	-1.2	5.08	-2.7	4.797	178.19
Tamoxifen	4.96	1.5	Withaferin A	0.248	0	F22	1.4792	8	5.9362	6.5	6.8908	106.36
Tamoxifen	3.04	0	Withaferin A	40	100	G13	100	99.7	0.38178	-0.3	0.22042	81.65
Tamoxifen	3.04	0	Withaferin A	30	99.5	G14	99.493	99.1	0.095779	-0.3	0.15303	44.176
Tamoxifen	3.04	0	Withaferin A	20	95.9	G15	95.909	95.8	1.1276	-0.1	1.3071	978.99
Tamoxifen	3.04	0	Withaferin A	10	75.9	G16	75.944	75.4	4.5946	-0.5	4.7482	905.83
Tamoxifen	3.04	0	Withaferin A	4.96	0	G17	0	-22.2	28.012	-22.2	24.267	109.1
Tamoxifen	3.04	0	Withaferin A	3.04	0	G18	0	-27.1	2.1028	-27.1	10.769	39.774
Tamoxifen	3.04	0	Withaferin A	2	0	G19	0	-7.4	9.8922	-7.4	6.8198	91.586
Tamoxifen	3.04	0	Withaferin A	0.96	0	G20	0	-1.1	9.0639	-1.1	7.1478	648.97
Tamoxifen	3.04	0	Withaferin A	0.5	0	G21	0	-10.9	6.8276	-10.9	4.8922	44.909
Tamoxifen	3.04	0	Withaferin A	0.248	0	G22	0	3.3	7.447	3.3	6.9896	214.98
Tamoxifen	2	0.1	Withaferin A	40	100	H13	100	99.9	0.10562	-0.1	0.060982	81.65
Tamoxifen	2	0.1	Withaferin A	30	99.5	H14	99.493	99	0.44656	-0.5	0.29452	59.304
Tamoxifen	2	0.1	Withaferin A	20	95.9	H15	95.914	95.9	0.9503	0	1.2569	6708.1
Tamoxifen	2	0.1	Withaferin A	10	75.9	H16	75.977	74.8	12.949	-1.2	8.4424	718.16
Tamoxifen	2	0.1	Withaferin A	4.96	0	H17	0.13773	-3.9	28.009	-4	24.219	599.71
Tamoxifen	2	0.1	Withaferin A	3.04	0	H18	0.13773	-29.8	23.07	-29.9	17.035	56.936
Tamoxifen	2	0.1	Withaferin A	2	0	H19	0.13773	-1.2	12.774	-1.4	8.1751	604.56
Tamoxifen	2	0.1	Withaferin A	0.96	0	H20	0.13773	3	14.696	2.9	9.7067	338.42
Tamoxifen	2	0.1	Withaferin A	0.5	0	H21	0.13773	-11.3	8.2882	-11.5	5.4642	47.694
Tamoxifen	2	0.1	Withaferin A	0.248	0	H22	0.13773	8.6	14.15	8.4	9.7783	116.03
Tamoxifen	0.96	0	Withaferin A	40	100	I13	100	100	0.036353	0	0.020988	81.65
Tamoxifen	0.96	0	Withaferin A	30	99.5	I14	99.493	98.5	0.6702	-1	0.41227	40.358
Tamoxifen	0.96	0	Withaferin A	20	95.9	I15	95.909	94.9	0.13107	-1.1	1.1326	107.68
Tamoxifen	0.96	0	Withaferin A	10	75.9	I16	75.944	68.6	3.5302	-7.3	4.4039	59.956
Tamoxifen	0.96	0	Withaferin A	4.96	0	I17	0	-24.6	6.3261	-24.6	18.332	74.605
Tamoxifen	0.96	0	Withaferin A	3.04	0	I18	0	-42.8	10.45	-42.8	12.094	28.239
Tamoxifen	0.96	0	Withaferin A	2	0	I19	0	-4.3	5.6163	-4.3	4.4456	104.4
Tamoxifen	0.96	0	Withaferin A	0.96	0	I20	0	-10.6	11.311	-10.6	7.8555	74.344
Tamoxifen	0.96	0	Withaferin A	0.5	0	I21	0	-8.4	3.2665	-8.4	2.7037	32.146
Tamoxifen	0.96	0	Withaferin A	0.248	0	I22	0	0.5	5.5189	0.5	5.9899	1115.6
Tamoxifen	0.5	0	Withaferin A	40	100	J13	100	100	0.026447	0	0.015269	81.65
Tamoxifen	0.5	0	Withaferin A	30	99.5	J14	99.493	98.9	0.38549	-0.6	0.26492	46.255
Tamoxifen	0.5	0	Withaferin A	20	95.9	J15	95.909	94.8	0.82649	-1.1	1.2375	109.02
Tamoxifen	0.5	0	Withaferin A	10	75.9	J16	75.944	70.7	1.1464	-5.2	4.0741	78.218
Tamoxifen	0.5	0	Withaferin A	4.96	0	J17	0	-18.1	22.547	-18.1	22.541	124.66
Tamoxifen	0.5	0	Withaferin A	3.04	0	J18	0	-43	10.661	-43	12.793	29.73
Tamoxifen	0.5	0	Withaferin A	2	0	J19	0	-11.4	9.4522	-11.4	7.4118	65.026
Tamoxifen	0.5	0	Withaferin A	0.96	0	J20	0	-18.3	9.2907	-18.3	7.9839	43.617
Tamoxifen	0.5	0	Withaferin A	0.5	0	J21	0	-9.9	2.252	-9.9	4.6205	46.472
Tamoxifen	0.5	0	Withaferin A	0.248	0	J22	0	-5	4.1148	-5	6.8757	138.74
Tamoxifen	0.248	0	Withaferin A	40	100	K13	100	100	8.2046e-15	0	6.6991e-15	0
Tamoxifen	0.248	0	Withaferin A	30	99.5	K14	99.493	98.5	0.69189	-1	0.42411	41.557
Tamoxifen	0.248	0	Withaferin A	20	95.9	K15	95.909	95	1.3092	-0.9	1.3609	156.95
Tamoxifen	0.248	0	Withaferin A	10	75.9	K16	75.944	67.8	9.6373	-8.1	6.8064	83.816
Tamoxifen	0.248	0	Withaferin A	4.96	0	K17	0	-23.7	18.227	-23.7	20.873	88.223
Tamoxifen	0.248	0	Withaferin A	3.04	0	K18	0	-35.2	13.324	-35.2	13.086	37.227
Tamoxifen	0.248	0	Withaferin A	2	0	K19	0	-7.2	6.6976	-7.2	5.14	71.779
Tamoxifen	0.248	0	Withaferin A	0.96	0	K20	0	-15	10.658	-15	7.6905	51.216
Tamoxifen	0.248	0	Withaferin A	0.5	0	K21	0	-4.7	8.5767	-4.7	5.5219	117.76
Tamoxifen	0.248	0	Withaferin A	0.248	0	K22	0	5.1	11.037	5.1	8.2793	163.06

## Sheet: 48 Hours
Drug1	Drug1Conc	Drug1_NPI	Drug2	Drug2Conc	Drug2_NPI	Sci_WellID	PredictedInhibition	ObservedInhibition	Comb_NPI_StdDev	Excess Over BLISS	Excess Over BLISS Error	Excess Over BLISS Error Percent
									Comb_NPI_StdDev																	65
Tamoxifen	40	99.8	Withaferin A	40	100	B13	100	100	0	0	0	0		Tamoxifen (uM)			Excess Over BLISS
Tamoxifen	40	99.8	Withaferin A	30	100	B14	100	100	0	0	0	0		40	0.2	0.2	0.2	0.2	0.2	0.1	0	0	0	0
Tamoxifen	40	99.8	Withaferin A	20	99.9	B15	100	100	0	0	0.00017292	115.47		30	7.7	4.9	8.7	9.9	10.9	5.1	0.3	0	0	0
Tamoxifen	40	99.8	Withaferin A	10	96.7	B16	99.992	100	0	0	0.0070425	88.109		20	5.4	-8.4	16.6	46.7	55.1	26.9	1.8	0	0	0
Tamoxifen	40	99.8	Withaferin A	4.96	51.6	B17	99.882	100	0	0.1	0.096314	81.658		10	-10.7	-5.4	-13.8	3.3	9.1	21.6	1.4	0	0	0
Tamoxifen	40	99.8	Withaferin A	3.04	0	B18	99.757	100	0	0.2	0.19958	81.963		4.96	-2.8	-5.4	-12.2	5.1	-10.2	12.2	-0.2	-0.1	0	0
Tamoxifen	40	99.8	Withaferin A	2	0	B19	99.757	100	0	0.2	0.19889	81.681		3.04	2.4	-0.8	-7.3	2.1	-22	-7.7	-0.8	-0.3	0	0
Tamoxifen	40	99.8	Withaferin A	0.96	13.4	B20	99.789	100	0	0.2	0.17212	81.652		2	-6.1	-2.7	-10.6	5.2	-25.1	5.5	-2.6	-0.2	-0.1	0
Tamoxifen	40	99.8	Withaferin A	0.5	11.7	B21	99.785	100	0	0.2	0.17574	81.754		0.96	-9.8	-8.4	-16.9	-16.5	-42.8	-13.6	-2.7	-0.4	0	0
Tamoxifen	40	99.8	Withaferin A	0.248	11.5	B22	99.785	100	0	0.2	0.17592	81.654		0.5	-6.2	-0.3	-8.9	-3.3	-32.6	-8	-1.7	-0.1	0	0		-45
Tamoxifen	30	89	Withaferin A	40	100	C13	100	100	0.0036133	0	0.0020861	81.65		0.248	-6	-0.2	-6.3	2.2	-24.8	-10.8	-1.2	-0.3	0	0
Tamoxifen	30	89	Withaferin A	30	100	C14	100	100	0.049777	0	0.028739	61.033			0.248	0.5	0.96	2	3.04	4.96	10	20	30	40
Tamoxifen	30	89	Withaferin A	20	99.9	C15	99.993	100	0.00090533	0	0.007658	109.01			Withaferin A (uM)
Tamoxifen	30	89	Withaferin A	10	96.7	C16	99.64	99.9	0.098606	0.3	0.31194	111.96
Tamoxifen	30	89	Withaferin A	4.96	51.6	C17	94.687	99.8	0.2686	5.1	4.1732	81.971		Tamoxifen (uM)			Observed % Inhibition
Tamoxifen	30	89	Withaferin A	3.04	0	C18	89.031	100	0.0077436	10.9	8.6442	78.949		40	99.8	100	100	100	100	100	100	100	100	100	100		100
Tamoxifen	30	89	Withaferin A	2	0	C19	89.031	98.9	1.3309	9.9	8.6462	87.713		30	89	98	95.2	99.2	98.9	100	99.8	99.9	100	100	100
Tamoxifen	30	89	Withaferin A	0.96	13.4	C20	90.504	99.2	0.12242	8.7	7.4531	85.568		20	43.4	55.3	41.6	67.6	90	98.5	99.5	100	100	100	100
Tamoxifen	30	89	Withaferin A	0.5	11.7	C21	90.317	95.2	5.3424	4.9	8.2113	167.87		10	33.1	30.2	35.5	28.3	36.4	42.2	89.2	99.2	99.9	100	100
Tamoxifen	30	89	Withaferin A	0.248	11.5	C22	90.295	98	0.7156	7.7	7.6283	98.793		4.96	16	22.9	20.4	15.1	21.1	5.8	71.5	97	99.9	100	100
Tamoxifen	20	43.4	Withaferin A	40	100	D13	100	100	0.064634	0	0.037317	81.65		3.04	10	22.8	19.8	14.8	12.1	-12	48.7	96.2	99.6	100	100
Tamoxifen	20	43.4	Withaferin A	30	100	D14	100	100	0.0014433	0	0.00083327	5.6399		2	10.2	14.5	18	11.6	15.3	-14.9	62	94.5	99.8	99.9	100
Tamoxifen	20	43.4	Withaferin A	20	99.9	D15	99.965	100	0.0019358	0	0.029259	176.95		0.96	15.3	15.3	16.8	9.8	-1.2	-27.5	45.3	94.5	99.6	100	100
Tamoxifen	20	43.4	Withaferin A	10	96.7	D16	98.142	100	0.004139	1.8	0.71507	38.8		0.5	7	11.5	17.6	10.6	3.7	-25.6	47	95.3	99.9	100	100
Tamoxifen	20	43.4	Withaferin A	4.96	51.6	D17	72.576	99.5	0.52077	26.9	5.3909	20.033		0.248	5.6	10.5	16.5	12	7.8	-19.2	43.4	95.7	99.6	100	100
Tamoxifen	20	43.4	Withaferin A	3.04	0	D18	43.385	98.5	0.5482	55.1	11.815	21.424		0		11.5	11.7	13.4	3.9175	12.407	51.6	96.7	99.9	100	100
Tamoxifen	20	43.4	Withaferin A	2	0	D19	43.385	90	7.9653	46.7	12.076	25.885			0	0.248	0.5	0.96	2	3.04	4.96	10	20	30	40		-45
Tamoxifen	20	43.4	Withaferin A	0.96	13.4	D20	50.987	67.6	17.005	16.6	13.737	82.536			Withaferin A (uM)
Tamoxifen	20	43.4	Withaferin A	0.5	11.7	D21	50.02	41.6	9.8847	-8.4	11.52	137.1
Tamoxifen	20	43.4	Withaferin A	0.248	11.5	D22	49.907	55.3	13.031	5.4	12.373	229.4
Tamoxifen	10	33.1	Withaferin A	40	100	E13	100	100	0	0	0	0
Tamoxifen	10	33.1	Withaferin A	30	100	E14	100	100	0.0016733	0	0.00096608	6.3142
Tamoxifen	10	33.1	Withaferin A	20	99.9	E15	99.959	99.9	0.045208	0	0.042764	100.23
Tamoxifen	10	33.1	Withaferin A	10	96.7	E16	97.805	99.2	0.47836	1.4	0.81266	57.937
Tamoxifen	10	33.1	Withaferin A	4.96	51.6	E17	67.603	89.2	3.4062	21.6	4.015	18.618
Tamoxifen	10	33.1	Withaferin A	3.04	0	E18	33.119	42.2	24.785	9.1	16.713	183.37
Tamoxifen	10	33.1	Withaferin A	2	0	E19	33.119	36.4	2.5995	3.3	7.4936	227.97
Tamoxifen	10	33.1	Withaferin A	0.96	13.4	E20	42.1	28.3	8.7075	-13.8	8.0058	57.877
Tamoxifen	10	33.1	Withaferin A	0.5	11.7	E21	40.958	35.5	0.93293	-5.4	6.8149	125.95
Tamoxifen	10	33.1	Withaferin A	0.248	11.5	E22	40.824	30.2	5.6536	-10.7	7.1621	67.212
Tamoxifen	4.96	16	Withaferin A	40	100	F13	100	100	0	0	0	0
Tamoxifen	4.96	16	Withaferin A	30	100	F14	100	100	0.018703	0	0.010798	36.512
Tamoxifen	4.96	16	Withaferin A	20	99.9	F15	99.948	99.9	0.044989	-0.1	0.04959	93.122
Tamoxifen	4.96	16	Withaferin A	10	96.7	F16	97.243	97	1.3421	-0.2	1.2045	501.96
Tamoxifen	4.96	16	Withaferin A	4.96	51.6	F17	59.32	71.5	7.5294	12.2	4.7804	39.188
Tamoxifen	4.96	16	Withaferin A	3.04	0	F18	16.02	5.8	10.445	-10.2	9.4052	92.116
Tamoxifen	4.96	16	Withaferin A	2	0	F19	16.02	21.1	2.3039	5.1	4.613	91.09
Tamoxifen	4.96	16	Withaferin A	0.96	13.4	F20	27.297	15.1	4.6932	-12.2	4.4133	36.188
Tamoxifen	4.96	16	Withaferin A	0.5	11.7	F21	25.863	20.4	7.9562	-5.4	6.5454	120.66
Tamoxifen	4.96	16	Withaferin A	0.248	11.5	F22	25.695	22.9	3.1286	-2.8	4.0102	145.21
Tamoxifen	3.04	10	Withaferin A	40	100	G13	100	100	0	0	0	0
Tamoxifen	3.04	10	Withaferin A	30	100	G14	100	100	0.0015187	0	0.00087685	5.9421
Tamoxifen	3.04	10	Withaferin A	20	99.9	G15	99.945	99.6	0.27035	-0.3	0.16251	52.003
Tamoxifen	3.04	10	Withaferin A	10	96.7	G16	97.046	96.2	0.95853	-0.8	1.1305	140.47
Tamoxifen	3.04	10	Withaferin A	4.96	51.6	G17	56.412	48.7	6.4812	-7.7	4.1887	54.198
Tamoxifen	3.04	10	Withaferin A	3.04	0	G18	10.016	-12	7.7578	-22	8.6957	39.473
Tamoxifen	3.04	10	Withaferin A	2	0	G19	10.016	12.1	5.5046	2.1	5.3148	250.15
Tamoxifen	3.04	10	Withaferin A	0.96	13.4	G20	22.099	14.8	4.8342	-7.3	4.3052	58.734
Tamoxifen	3.04	10	Withaferin A	0.5	11.7	G21	20.562	19.8	1.3482	-0.8	4.7174	594.14
Tamoxifen	3.04	10	Withaferin A	0.248	11.5	G22	20.382	22.8	4.8697	2.4	4.3924	183.56
Tamoxifen	2	10.2	Withaferin A	40	100	H13	100	100	0	0	0	0
Tamoxifen	2	10.2	Withaferin A	30	100	H14	100	99.9	0.039663	-0.1	0.022899	40.237
Tamoxifen	2	10.2	Withaferin A	20	99.9	H15	99.945	99.8	0.20139	-0.2	0.12473	70.231
Tamoxifen	2	10.2	Withaferin A	10	96.7	H16	97.051	94.5	0.86448	-2.6	1.0996	42.639
Tamoxifen	2	10.2	Withaferin A	4.96	51.6	H17	56.486	62	19.878	5.5	11.548	211.28
Tamoxifen	2	10.2	Withaferin A	3.04	0	H18	10.168	-14.9	15.39	-25.1	11.238	44.833
Tamoxifen	2	10.2	Withaferin A	2	0	H19	10.168	15.3	2.0361	5.2	3.3845	65.533
Tamoxifen	2	10.2	Withaferin A	0.96	13.4	H20	22.23	11.6	3.1912	-10.6	2.8457	26.862
Tamoxifen	2	10.2	Withaferin A	0.5	11.7	H21	20.696	18	7.9352	-2.7	6.0265	224.44
Tamoxifen	2	10.2	Withaferin A	0.248	11.5	H22	20.517	14.5	1.4621	-6.1	2.4062	39.666
Tamoxifen	0.96	15.3	Withaferin A	40	100	I13	100	100	0	0	0	0
Tamoxifen	0.96	15.3	Withaferin A	30	100	I14	100	100	0.0060185	0	0.0034748	11.334
Tamoxifen	0.96	15.3	Withaferin A	20	99.9	I15	99.948	99.6	0.31523	-0.4	0.1869	53.255
Tamoxifen	0.96	15.3	Withaferin A	10	96.7	I16	97.221	94.5	0.65986	-2.7	0.99718	36.64
Tamoxifen	0.96	15.3	Withaferin A	4.96	51.6	I17	58.995	45.3	2.5002	-13.6	1.6927	12.401
Tamoxifen	0.96	15.3	Withaferin A	3.04	0	I18	15.35	-27.5	17.698	-42.8	11.981	27.973
Tamoxifen	0.96	15.3	Withaferin A	2	0	I19	15.35	-1.2	8.1424	-16.5	5.3034	32.128
Tamoxifen	0.96	15.3	Withaferin A	0.96	13.4	I20	26.716	9.8	6.0461	-16.9	3.765	22.27
Tamoxifen	0.96	15.3	Withaferin A	0.5	11.7	I21	25.271	16.8	1.7274	-8.4	3.5119	41.597
Tamoxifen	0.96	15.3	Withaferin A	0.248	11.5	I22	25.102	15.3	6.8831	-9.8	4.2446	43.5
Tamoxifen	0.5	7	Withaferin A	40	100	J13	100	100	0	0	0	0
Tamoxifen	0.5	7	Withaferin A	30	100	J14	100	100	0.0083306	0	0.0048097	18.629
Tamoxifen	0.5	7	Withaferin A	20	99.9	J15	99.943	99.9	0.085715	-0.1	0.06806	74.341
Tamoxifen	0.5	7	Withaferin A	10	96.7	J16	96.948	95.3	1.894	-1.7	1.4924	88.098
Tamoxifen	0.5	7	Withaferin A	4.96	51.6	J17	54.966	47	5.1071	-8	3.3474	42.088
Tamoxifen	0.5	7	Withaferin A	3.04	0	J18	7.0316	-25.6	3.2243	-32.6	7.5729	23.196
Tamoxifen	0.5	7	Withaferin A	2	0	J19	7.0316	3.7	2.191	-3.3	3.944	119.85
Tamoxifen	0.5	7	Withaferin A	0.96	13.4	J20	19.515	10.6	5.0688	-8.9	3.9968	45.024
Tamoxifen	0.5	7	Withaferin A	0.5	11.7	J21	17.928	17.6	3.2391	-0.3	4.7312	1695.3
Tamoxifen	0.5	7	Withaferin A	0.248	11.5	J22	17.742	11.5	3.1036	-6.2	3.3357	53.737
Tamoxifen	0.248	5.6	Withaferin A	40	100	K13	100	100	0	0	0	0
Tamoxifen	0.248	5.6	Withaferin A	30	100	K14	100	100	0	0	0	0
Tamoxifen	0.248	5.6	Withaferin A	20	99.9	K15	99.942	99.6	0.56473	-0.3	0.32948	96.545
Tamoxifen	0.248	5.6	Withaferin A	10	96.7	K16	96.902	95.7	0.27575	-1.2	1.0459	90.272
Tamoxifen	0.248	5.6	Withaferin A	4.96	51.6	K17	54.279	43.4	5.9417	-10.8	3.9377	36.333
Tamoxifen	0.248	5.6	Withaferin A	3.04	0	K18	5.6124	-19.2	15.336	-24.8	11.783	47.544
Tamoxifen	0.248	5.6	Withaferin A	2	0	K19	5.6124	7.8	5.2809	2.2	5.3457	244.26
Tamoxifen	0.248	5.6	Withaferin A	0.96	13.4	K20	18.287	12	3.7767	-6.3	4.0079	63.375
Tamoxifen	0.248	5.6	Withaferin A	0.5	11.7	K21	16.675	16.5	4.6763	-0.2	5.5293	2666.1
Tamoxifen	0.248	5.6	Withaferin A	0.248	11.5	K22	16.486	10.5	3.5042	-6	4.0108	66.662
											#REF!

## Sheet: monotherapies
12Hrs					24Hrs					48Hrs
DRUG	CONCENTRATION uM	INHIBITION	STDEV		DRUG	CONCENTRATION uM	INHIBITION	STDEV		DRUG	CONCENTRATION uM	INHIBITION	STDEV
Tamoxifen	40	88.579	12.981		Tamoxifen	40	100	8.2e-15		Tamoxifen	40	99.757	0.34435
Tamoxifen	30	51.572	26.318		Tamoxifen	30	94.956	3.1213		Tamoxifen	30	89.031	14.91
Tamoxifen	20	19.004	18.248		Tamoxifen	20	34.681	5.5897		Tamoxifen	20	43.385	19.212
Tamoxifen	10	10.693	5.4327		Tamoxifen	10	16.088	8.7911		Tamoxifen	10	33.119	12.443
Tamoxifen	4.96	0.51624	10.412		Tamoxifen	4.96	1.4792	6.4708		Tamoxifen	4.96	16.02	6.9071
Tamoxifen	3.04	-2.2077	3.7516		Tamoxifen	3.04	-5.835	4.8774		Tamoxifen	3.04	10.016	6.4819
Tamoxifen	2	5.0933	9.7722		Tamoxifen	2	0.13773	4.4143		Tamoxifen	2	10.168	4.2232
Tamoxifen	0.96	-3.1787	11.097		Tamoxifen	0.96	-0.32341	3.1404		Tamoxifen	0.96	15.35	2.6617
Tamoxifen	0.5	-0.8955	6.9816		Tamoxifen	0.5	-3.7256	7.5879		Tamoxifen	0.5	7.0316	5.3479
Tamoxifen	0.248	-2.3619	2.2078		Tamoxifen	0.248	-3.1948	4.064		Tamoxifen	0.248	5.6124	6.646
Withaferin A	40	86.264	3.4021		Withaferin A	40	100	8.2e-15		Withaferin A	40	100	0
Withaferin A	30	85.052	1.2499		Withaferin A	30	99.493	0.2459		Withaferin A	30	100	0
Withaferin A	20	73.7	5.1356		Withaferin A	20	95.909	1.9531		Withaferin A	20	99.938	0.086978
Withaferin A	10	57.564	10.563		Withaferin A	10	75.944	6.7193		Withaferin A	10	96.717	1.8828
Withaferin A	4.96	-11.92	21.532		Withaferin A	4.96	-14.709	30.956		Withaferin A	4.96	51.56	0.97561
Withaferin A	3.04	-22.411	9.4947		Withaferin A	3.04	-43.638	17.88		Withaferin A	3.04	-17.472	12.407
Withaferin A	2	-9.4491	0.95988		Withaferin A	2	-19.975	4.229		Withaferin A	2	-2.3163	3.9175
Withaferin A	0.96	-13.455	2.4718		Withaferin A	0.96	-7.8829	6.8798		Withaferin A	0.96	13.428	0.96005
Withaferin A	0.5	-0.5544	4.9584		Withaferin A	0.5	-18.865	1.182		Withaferin A	0.5	11.72	6.3061
Withaferin A	0.248	8.3246	5.664		Withaferin A	0.248	-5.0791	8.2047		Withaferin A	0.248	11.52	1.2541
