# Supplementary material for: The transcriptomic response of cells to a drug combination is more than the sum of the responses to the monotherapies
Source: eLife. 2020 Sep 18;9:e52707. doi: 10.7554/eLife.52707 (PMC7546737; doi:10.7554/eLife.52707)
Supplement: Supplementary file 3. [file elife-52707-supp3.xlsx]

## Sheet: Combinations
Assay	Drug1	Hours	Drug1Conc	Drug1_NPI	Drug 1 Viability	Drug1_StdDev	Drug2	Drug2Conc	Drug2 NPI	Drug 2 Viability	Drug2 StdDev	Predicted Inhibition	Predicted Viability	Observed Inhibition	Observed Inhibition StdDev	Observed Viability	Excess Over BLISS	Excess Over BLISS Error
CTG	Mefloquine	0	10	3.29212	96.7079	0.702932	Withaferin A	5	-1.53199	101.532	6.90126	1.81057	98.1894	3.8	2.3869	96.2	1.9	4.11298
CTG	Mefloquine	3	10	10.1994	89.8006	1.89144	Withaferin A	5	-5.73553	105.736	6.57082	5.04886	94.9511	-3.6	3.7823	103.6	-8.6	4.20805
CTG	Mefloquine	6	10	6.06685	93.9332	7.10558	Withaferin A	5	-35.7633	135.763	5.22244	-27.5268	127.527	-13.1	1.9436	113.1	14.4	6.3483
CTG	Mefloquine	9	10	15.8559	84.1441	2.55253	Withaferin A	5	-31.9967	131.997	0.716729	-11.0675	111.067	-10.5	4.2889	110.5	0.6	3.16807
CTG	Mefloquine	12	10	17.1474	82.8526	2.62952	Withaferin A	5	-36.1528	136.153	4.12288	-12.8061	112.806	-1.6	0.48749	101.6	11.2	2.87075
CTG	Mefloquine	24	10	12.0338	87.9662	1.78542	Withaferin A	5	-50.2265	150.226	8.28278	-32.1485	132.148	27.0	2.451	73	59.1	4.70064
CTG	Mefloquine	48	10	17.8839	82.1161	3.91547	Withaferin A	5	-4.64545	104.645	2.85572	14.0692	85.9308	95.0	0.92005	5	80.9	2.77693
InCell	Mefloquine	0	10	1.27445	98.7256	3.36912	Withaferin A	5	-9.62648	109.626	3.22834	-8.22935	108.229	-3.8	1.98	103.8	4.5	3.03975
InCell	Mefloquine	3	10	-17.1799	117.18	4.91869	Withaferin A	5	7.41251	92.5875	2.93762	-8.49395	108.494	-12.5	2.2592	112.5	-4.0	3.54463
InCell	Mefloquine	6	10	-1.228	101.228	1.46602	Withaferin A	5	-1.17121	101.171	2.16251	-2.41359	102.414	8.9	2.3398	91.1	11.4	2.0385
InCell	Mefloquine	9	10	0.245821	99.7542	0.280235	Withaferin A	5	9.74154	90.2585	1.73293	9.96341	90.0366	13.3	0.92731	86.7	3.3	1.14195
InCell	Mefloquine	12	10	-4.4513	104.451	1.30247	Withaferin A	5	11.8107	88.1893	3.00989	7.88513	92.1149	12.5	2.3901	87.5	4.6	2.37457
InCell	Mefloquine	24	10	-17.794	117.794	3.16815	Withaferin A	5	34.0764	65.9236	2.91887	22.346	77.654	55.6	0.38733	44.4	33.2	2.33336
InCell	Mefloquine	48	10	-6.00096	106.001	2.74534	Withaferin A	5	78.4336	21.5664	2.23516	77.1394	22.8606	86.9	0.84879	13.1	9.8	1.49271
RTG	Mefloquine	0	10	1.54056	98.4594	1.45863	Withaferin A	5	1.42595	98.5741	2.60988	2.94454	97.0555	-0.4	0.94035	100.4	-3.4	1.78464
RTG	Mefloquine	1	10	-8.89371	108.894	1.50273	Withaferin A	5	47.1185	52.8815	1.93686	42.4154	57.5846	38.3	1.6545	61.7	-4.1	1.61423
RTG	Mefloquine	1.5	10	0.256912	99.7431	1.40511	Withaferin A	5	55.1135	44.8865	1.93369	55.2288	44.7712	43.0	3.5459	57	-12.2	2.35877
RTG	Mefloquine	3	10	10.6701	89.3299	1.48889	Withaferin A	5	49.7837	50.2163	1.99445	55.1419	44.8581	53.6	0.96203	46.4	-1.6	1.24616
RTG	Mefloquine	4.5	10	13.4457	86.5543	1.37281	Withaferin A	5	47.5781	52.4219	2.06211	54.6266	45.3734	50.4	1.1112	49.6	-4.2	1.283
RTG	Mefloquine	6	10	16.4909	83.5091	1.35703	Withaferin A	5	49.023	50.977	2.08614	57.4295	42.5705	51.2	1.0092	48.8	-6.2	1.2291
RTG	Mefloquine	7.5	10	18.74	81.26	1.41863	Withaferin A	5	48.4598	51.5402	2.18196	58.1184	41.8816	51.7	1.0813	48.3	-6.4	1.27117
RTG	Mefloquine	9	10	20.4854	79.5146	1.25293	Withaferin A	5	48.1947	51.8053	2.17776	58.8072	41.1928	54.5	0.93482	45.5	-4.3	1.19635
RTG	Mefloquine	10.5	10	21.6836	78.3164	1.03494	Withaferin A	5	47.5089	52.4911	2.04949	58.8909	41.1091	56.1	0.95577	43.9	-2.8	1.12323
RTG	Mefloquine	12	10	22.7365	77.2635	1.15952	Withaferin A	5	46.9743	53.0257	2.11789	59.0304	40.9696	58.8	1.0167	41.2	-0.2	1.16753
RTG	Mefloquine	18	10	26.1105	73.8895	1.12364	Withaferin A	5	41.4926	58.5074	2.12425	56.7691	43.2309	68.0	1.8151	32	11.2	1.43649
RTG	Mefloquine	24	10	31.0282	68.9718	1.25416	Withaferin A	5	40.5594	59.4406	2.40039	59.0028	40.9972	82.3	1.7367	17.7	23.3	1.45062
CTG	Tamoxifen	0	20	2.05618	97.9438	4.46342	Mefloquine	10	3.29212	96.7079	0.702932	5.28061	94.7194	18.0	1.8303	82	12.7	2.73593
CTG	Tamoxifen	3	20	15.3938	84.6062	2.19397	Mefloquine	10	10.1994	89.8006	1.89144	24.0231	75.9769	24.2	5.694	75.8	0.1	3.59926
CTG	Tamoxifen	6	20	19.405	80.595	1.87814	Mefloquine	10	6.06685	93.9332	7.10558	24.2946	75.7054	28.9	6.8544	71.1	4.6	5.25645
CTG	Tamoxifen	9	20	21.2303	78.7697	1.23995	Mefloquine	10	15.8559	84.1441	2.55253	33.7199	66.2801	45.9	8.2035	54.1	12.2	4.91355
CTG	Tamoxifen	12	20	21.7314	78.2686	1.31716	Mefloquine	10	17.1474	82.8526	2.62952	35.1525	64.8475	67.1	5.5862	32.9	32.0	3.4944
CTG	Tamoxifen	24	20	17.1887	82.8113	0.61436	Mefloquine	10	12.0338	87.9662	1.78542	27.1541	72.8459	97.0	0.7917	3	69.8	1.01733
CTG	Tamoxifen	48	20	31.1293	68.8707	0.901305	Mefloquine	10	17.8839	82.1161	3.91547	43.4461	56.5539	99.5	0.2934	0.5	56.0	1.62333
InCell	Tamoxifen	0	20	-1.62712	101.627	1.01571	Mefloquine	10	1.27445	98.7256	3.36912	-0.33194	100.332	14.3	0.74409	85.7	14.6	2.10417
InCell	Tamoxifen	3	20	-11.0572	111.057	4.82205	Mefloquine	10	-17.1799	117.18	4.91869	-30.1367	130.137	-20.1	33.11	120.1	10.0	19.6473
InCell	Tamoxifen	6	20	3.18001	96.82	1.36821	Mefloquine	10	-1.228	101.228	1.46602	1.99107	98.0089	23.5	0.67616	76.5	21.5	1.20971
InCell	Tamoxifen	9	20	2.94283	97.0572	1.24135	Mefloquine	10	0.245821	99.7542	0.280235	3.18142	96.8186	43.0	6.0693	57	39.8	3.57972
InCell	Tamoxifen	12	20	-2.8738	102.874	0.219264	Mefloquine	10	-4.4513	104.451	1.30247	-7.45302	107.453	43.3	1.6802	56.7	50.8	1.24779
InCell	Tamoxifen	24	20	-7.66177	107.662	1.33949	Mefloquine	10	-17.794	117.794	3.16815	-26.8191	126.819	77.0	1.9212	23	103.9	2.43685
InCell	Tamoxifen	48	20	-8.39368	108.394	3.36785	Mefloquine	10	-6.00096	106.001	2.74534	-14.8983	114.898	84.4	1.1738	15.6	99.3	2.76752
RTG	Tamoxifen	0	20	-1.11248	101.112	1.93007	Mefloquine	10	1.54056	98.4594	1.45863	0.445222	99.5548	-1.2	2.0452	101.2	-1.6	1.82293
RTG	Tamoxifen	1	20	-14.8214	114.821	2.77685	Mefloquine	10	-8.89371	108.894	1.50273	-25.0332	125.033	-31.0	3.7023	131	-6.0	2.93414
RTG	Tamoxifen	1.5	20	-16.0864	116.086	2.19461	Mefloquine	10	0.256912	99.7431	1.40511	-15.7882	115.788	-52.4	10.182	152.4	-36.6	6.08594
RTG	Tamoxifen	3	20	-8.46165	108.462	2.24818	Mefloquine	10	10.6701	89.3299	1.48889	3.11133	96.8887	-20.1	2.4377	120.1	-23.2	2.04802
RTG	Tamoxifen	4.5	20	-5.13699	105.137	2.15442	Mefloquine	10	13.4457	86.5543	1.37281	8.99945	91.0006	-11.6	2.334	111.6	-20.6	1.91555
RTG	Tamoxifen	6	20	-2.14567	102.146	2.09526	Mefloquine	10	16.4909	83.5091	1.35703	14.699	85.301	-0.2	4.5632	100.2	-14.9	2.93292
RTG	Tamoxifen	7.5	20	0.945894	99.0541	2.08205	Mefloquine	10	18.74	81.26	1.41863	19.5086	80.4914	17.3	7.3083	82.7	-2.2	4.40636
RTG	Tamoxifen	9	20	4.10756	95.8924	1.88698	Mefloquine	10	20.4854	79.5146	1.25293	23.7515	76.2485	38.3	8.8105	61.7	14.6	5.20642
RTG	Tamoxifen	10.5	20	4.55737	95.4426	1.65369	Mefloquine	10	21.6836	78.3164	1.03494	25.2528	74.7472	55.2	8.6188	44.8	30.0	5.06417
RTG	Tamoxifen	12	20	5.51838	94.4816	1.68684	Mefloquine	10	22.7365	77.2635	1.15952	27.0002	72.9998	67.9	7.5643	32.1	40.9	4.47652
RTG	Tamoxifen	18	20	11.2105	88.7895	1.50805	Mefloquine	10	26.1105	73.8895	1.12364	34.3939	65.6061	92.0	2.3214	8	57.6	1.59437
RTG	Tamoxifen	24	20	15.8374	84.1626	1.70772	Mefloquine	10	31.0282	68.9718	1.25416	41.9516	58.0484	97.5	0.69164	2.5	55.6	0.996636
CTG	Tamoxifen	0	20	2.05618	97.9438	4.46342	Withaferin A	5	-1.53199	101.532	6.90126	0.555694	99.4443	3.4	1.4525	96.6	2.9	4.7727
CTG	Tamoxifen	3	20	15.3938	84.6062	2.19397	Withaferin A	5	-5.73553	105.736	6.57082	10.5412	89.4588	7.4	3.264	92.6	-3.2	3.95563
CTG	Tamoxifen	6	20	19.405	80.595	1.87814	Withaferin A	5	-35.7633	135.763	5.22244	-9.41846	109.418	-8.4	3.3812	108.4	1.0	3.44723
CTG	Tamoxifen	9	20	21.2303	78.7697	1.23995	Withaferin A	5	-31.9967	131.997	0.716729	-3.9734	103.973	-3.6	2.1959	103.6	0.4	1.61447
CTG	Tamoxifen	12	20	21.7314	78.2686	1.31716	Withaferin A	5	-36.1528	136.153	4.12288	-6.56483	106.565	5.5	4.2298	94.5	12.0	3.2414
CTG	Tamoxifen	24	20	17.1887	82.8113	0.61436	Withaferin A	5	-50.2265	150.226	8.28278	-24.4045	124.405	48.3	0.85951	51.7	72.7	4.02647
CTG	Tamoxifen	48	20	31.1293	68.8707	0.901305	Withaferin A	5	-4.64545	104.645	2.85572	27.9299	72.0701	97.7	0.17034	2.3	69.7	1.26316
InCell	Tamoxifen	0	20	-1.62712	101.627	1.01571	Withaferin A	5	-9.62648	109.626	3.22834	-11.4102	111.41	-5.1	1.8953	105.1	6.3	2.28008
InCell	Tamoxifen	3	20	-11.0572	111.057	4.82205	Withaferin A	5	7.41251	92.5875	2.93762	-2.82505	102.825	-12.7	7.7026	112.7	-9.9	5.47438
InCell	Tamoxifen	6	20	3.18001	96.82	1.36821	Withaferin A	5	-1.17121	101.171	2.16251	2.04605	97.954	11.8	4.1589	88.2	9.7	2.80454
InCell	Tamoxifen	9	20	2.94283	97.0572	1.24135	Withaferin A	5	9.74154	90.2585	1.73293	12.3977	87.6023	17.2	2.1478	82.8	4.8	1.70265
InCell	Tamoxifen	12	20	-2.8738	102.874	0.219264	Withaferin A	5	11.8107	88.1893	3.00989	9.27632	90.7237	21.3	1.2613	78.7	12.0	1.93355
InCell	Tamoxifen	24	20	-7.66177	107.662	1.33949	Withaferin A	5	34.0764	65.9236	2.91887	29.0255	70.9745	64.2	1.0119	35.8	35.2	1.97307
InCell	Tamoxifen	48	20	-8.39368	108.394	3.36785	Withaferin A	5	78.4336	21.5664	2.23516	76.6233	23.3767	88.3	1.0287	11.7	11.7	1.57645
RTG	Tamoxifen	0	20	-1.11248	101.112	1.93007	Withaferin A	5	1.42595	98.5741	2.60988	0.329333	99.6707	-2.1	1.7874	102.1	-2.4	2.14309
RTG	Tamoxifen	1	20	-14.8214	114.821	2.77685	Withaferin A	5	47.1185	52.8815	1.93686	39.2808	60.7192	26.5	1.2075	73.5	-12.8	1.68921
RTG	Tamoxifen	1.5	20	-16.0864	116.086	2.19461	Withaferin A	5	55.1135	44.8865	1.93369	47.8928	52.1072	30.8	4.6417	69.2	-17.1	3.03068
RTG	Tamoxifen	3	20	-8.46165	108.462	2.24818	Withaferin A	5	49.7837	50.2163	1.99445	45.5346	54.4654	33.0	1.6067	67	-12.6	1.68676
RTG	Tamoxifen	4.5	20	-5.13699	105.137	2.15442	Withaferin A	5	47.5781	52.4219	2.06211	44.8852	55.1148	29.9	1.2849	70.1	-15.0	1.59447
RTG	Tamoxifen	6	20	-2.14567	102.146	2.09526	Withaferin A	5	49.023	50.977	2.08614	47.9292	52.0708	33.7	1.2236	66.3	-14.2	1.54691
RTG	Tamoxifen	7.5	20	0.945894	99.0541	2.08205	Withaferin A	5	48.4598	51.5402	2.18196	48.9473	51.0527	37.0	0.97228	63	-12.0	1.50202
RTG	Tamoxifen	9	20	4.10756	95.8924	1.88698	Withaferin A	5	48.1947	51.8053	2.17776	50.3226	49.6774	42.6	0.57523	57.4	-7.7	1.37205
RTG	Tamoxifen	10.5	20	4.55737	95.4426	1.65369	Withaferin A	5	47.5089	52.4911	2.04949	49.9011	50.0989	46.5	0.46849	53.5	-3.4	1.26481
RTG	Tamoxifen	12	20	5.51838	94.4816	1.68684	Withaferin A	5	46.9743	53.0257	2.11789	49.9004	50.0996	50.6	0.46296	49.4	0.7	1.29337
RTG	Tamoxifen	18	20	11.2105	88.7895	1.50805	Withaferin A	5	41.4926	58.5074	2.12425	48.0516	51.9484	70.5	1.4132	29.5	22.5	1.45293
RTG	Tamoxifen	24	20	15.8374	84.1626	1.70772	Withaferin A	5	40.5594	59.4406	2.40039	49.9733	50.0267	88.6	0.92657	11.4	38.6	1.4107

## Sheet: Assay Technology
Comb	Drug	Assay	Time (Hrs)	Conc. (uM)	Inhibition	Viability	StdDev	N	SEM
IBM CTG 0HrMefloquine10	Mefloquine	CTG	0	10	3.2921	96.7079	0.70293	3	0.0040584
IBM CTG 3HrsMefloquine10	Mefloquine	CTG	3	10	10.199	89.801	1.8914	3	0.01092
IBM CTG 6HrsMefloquine10	Mefloquine	CTG	6	10	6.0668	93.9332	7.1056	3	0.041024
IBM CTG 9HrsMefloquine10	Mefloquine	CTG	9	10	15.856	84.144	2.5525	3	0.014737
IBM CTG 12HrsMefloquine10	Mefloquine	CTG	12	10	17.147	82.853	2.6295	3	0.015182
IBM CTG 24HrsMefloquine10	Mefloquine	CTG	24	10	12.034	87.966	1.7854	3	0.010308
IBM CTG 48HrsMefloquine10	Mefloquine	CTG	48	10	17.884	82.116	3.9155	3	0.022606
IBM InCell 0HrMefloquine10	Mefloquine	InCell	0	10	1.2744	98.7256	3.3691	3	0.019452
IBM InCell 3HrsMefloquine10	Mefloquine	InCell	3	10	-17.18	117.18	4.9187	3	0.028398
IBM InCell 6HrsMefloquine10	Mefloquine	InCell	6	10	-1.228	101.228	1.466	3	0.0084641
IBM InCell 9HrsMefloquine10	Mefloquine	InCell	9	10	0.24582	99.7542	0.28024	3	0.0016179
IBM InCell 12HrsMefloquine10	Mefloquine	InCell	12	10	-4.4513	104.451	1.3025	3	0.0075198
IBM InCell 24HrsMefloquine10	Mefloquine	InCell	24	10	-17.794	117.794	3.1681	3	0.018291
IBM InCell 48HrsMefloquine10	Mefloquine	InCell	48	10	-6.001	106.001	2.7453	3	0.01585
IBM RTG_0HrMefloquine10	Mefloquine	RTG	0	10	1.5406	98.4594	1.4586	3	0.0084214
IBM RTG_01HrsMefloquine10	Mefloquine	RTG	1	10	-8.8937	108.894	1.5027	3	0.008676
IBM RTG_1.5HrsMefloquine10	Mefloquine	RTG	1.5	10	0.25691	99.7431	1.4051	3	0.0081124
IBM RTG_03HrsMefloquine10	Mefloquine	RTG	3	10	10.67	89.33	1.4889	3	0.0085961
IBM RTG_04.5HrsMefloquine10	Mefloquine	RTG	4.5	10	13.446	86.554	1.3728	3	0.0079259
IBM RTG_06HrsMefloquine10	Mefloquine	RTG	6	10	16.491	83.509	1.357	3	0.0078348
IBM RTG_07.5HrsMefloquine10	Mefloquine	RTG	7.5	10	18.74	81.26	1.4186	3	0.0081904
IBM RTG_09HrsMefloquine10	Mefloquine	RTG	9	10	20.485	79.515	1.2529	3	0.0072338
IBM RTG_10.5HrsMefloquine10	Mefloquine	RTG	10.5	10	21.684	78.316	1.0349	3	0.0059752
IBM RTG_12HrsMefloquine10	Mefloquine	RTG	12	10	22.736	77.264	1.1595	3	0.0066945
IBM RTG_18HrsMefloquine10	Mefloquine	RTG	18	10	26.11	73.89	1.1236	3	0.0064873
IBM RTG_24HrsMefloquine10	Mefloquine	RTG	24	10	31.028	68.972	1.2542	3	0.0072409
IBM CTG 0HrTamoxifen20	Tamoxifen	CTG	0	20	2.0562	97.9438	4.4634	3	0.02577
IBM CTG 3HrsTamoxifen20	Tamoxifen	CTG	3	20	15.394	84.606	2.194	3	0.012667
IBM CTG 6HrsTamoxifen20	Tamoxifen	CTG	6	20	19.405	80.595	1.8781	3	0.010843
IBM CTG 9HrsTamoxifen20	Tamoxifen	CTG	9	20	21.23	78.77	1.24	3	0.0071589
IBM CTG 12HrsTamoxifen20	Tamoxifen	CTG	12	20	21.731	78.269	1.3172	3	0.0076046
IBM CTG 24HrsTamoxifen20	Tamoxifen	CTG	24	20	17.189	82.811	0.61436	3	0.003547
IBM CTG 48HrsTamoxifen20	Tamoxifen	CTG	48	20	31.129	68.871	0.90131	3	0.0052037
IBM InCell 0HrTamoxifen20	Tamoxifen	InCell	0	20	-1.6271	101.627	1.0157	3	0.0058642
IBM InCell 3HrsTamoxifen20	Tamoxifen	InCell	3	20	-11.057	111.057	4.822	3	0.02784
IBM InCell 6HrsTamoxifen20	Tamoxifen	InCell	6	20	3.18	96.82	1.3682	3	0.0078994
IBM InCell 9HrsTamoxifen20	Tamoxifen	InCell	9	20	2.9428	97.0572	1.2413	3	0.0071669
IBM InCell 12HrsTamoxifen20	Tamoxifen	InCell	12	20	-2.8738	102.874	0.21926	3	0.0012659
IBM InCell 24HrsTamoxifen20	Tamoxifen	InCell	24	20	-7.6618	107.662	1.3395	3	0.0077336
IBM InCell 48HrsTamoxifen20	Tamoxifen	InCell	48	20	-8.3937	108.394	3.3678	3	0.019444
IBM RTG_0HrTamoxifen20	Tamoxifen	RTG	0	20	-1.1125	101.112	1.9301	3	0.011143
IBM RTG_01HrsTamoxifen20	Tamoxifen	RTG	1	20	-14.821	114.821	2.7768	3	0.016032
IBM RTG_1.5HrsTamoxifen20	Tamoxifen	RTG	1.5	20	-16.086	116.086	2.1946	3	0.012671
IBM RTG_03HrsTamoxifen20	Tamoxifen	RTG	3	20	-8.4616	108.462	2.2482	3	0.01298
IBM RTG_04.5HrsTamoxifen20	Tamoxifen	RTG	4.5	20	-5.137	105.137	2.1544	3	0.012439
IBM RTG_06HrsTamoxifen20	Tamoxifen	RTG	6	20	-2.1457	102.146	2.0953	3	0.012097
IBM RTG_07.5HrsTamoxifen20	Tamoxifen	RTG	7.5	20	0.94589	99.0541	2.082	3	0.012021
IBM RTG_09HrsTamoxifen20	Tamoxifen	RTG	9	20	4.1076	95.8924	1.887	3	0.010894
IBM RTG_10.5HrsTamoxifen20	Tamoxifen	RTG	10.5	20	4.5574	95.4426	1.6537	3	0.0095476
IBM RTG_12HrsTamoxifen20	Tamoxifen	RTG	12	20	5.5184	94.4816	1.6868	3	0.009739
IBM RTG_18HrsTamoxifen20	Tamoxifen	RTG	18	20	11.211	88.789	1.5081	3	0.0087067
IBM RTG_24HrsTamoxifen20	Tamoxifen	RTG	24	20	15.837	84.163	1.7077	3	0.0098596
IBM CTG 0HrWithaferin A5	WithaferinA	CTG	0	5	-1.532	101.532	6.9013	3	0.039844
IBM CTG 3HrsWithaferin A5	WithaferinA	CTG	3	5	-5.7355	105.736	6.5708	3	0.037937
IBM CTG 6HrsWithaferin A5	WithaferinA	CTG	6	5	-35.763	135.763	5.2224	3	0.030152
IBM CTG 9HrsWithaferin A5	WithaferinA	CTG	9	5	-31.997	131.997	0.71673	3	0.004138
IBM CTG 12HrsWithaferin A5	WithaferinA	CTG	12	5	-36.153	136.153	4.1229	3	0.023803
IBM CTG 24HrsWithaferin A5	WithaferinA	CTG	24	5	-50.226	150.226	8.2828	3	0.047821
IBM CTG 48HrsWithaferin A5	WithaferinA	CTG	48	5	-4.6454	104.645	2.8557	3	0.016487
IBM InCell 0HrWithaferin A5	WithaferinA	InCell	0	5	-9.6265	109.626	3.2283	3	0.018639
IBM InCell 3HrsWithaferin A5	WithaferinA	InCell	3	5	7.4125	92.5875	2.9376	3	0.01696
IBM InCell 6HrsWithaferin A5	WithaferinA	InCell	6	5	-1.1712	101.171	2.1625	3	0.012485
IBM InCell 9HrsWithaferin A5	WithaferinA	InCell	9	5	9.7415	90.2585	1.7329	3	0.010005
IBM InCell 12HrsWithaferin A5	WithaferinA	InCell	12	5	11.811	88.189	3.0099	3	0.017378
IBM InCell 24HrsWithaferin A5	WithaferinA	InCell	24	5	34.076	65.924	2.9189	3	0.016852
IBM InCell 48HrsWithaferin A5	WithaferinA	InCell	48	5	78.434	21.566	2.2352	3	0.012905
IBM RTG_0HrWithaferin A5	WithaferinA	RTG	0	5	1.4259	98.5741	2.6099	3	0.015068
IBM RTG_01HrsWithaferin A5	WithaferinA	RTG	1	5	47.119	52.881	1.9369	3	0.011182
IBM RTG_1.5HrsWithaferin A5	WithaferinA	RTG	1.5	5	55.113	44.887	1.9337	3	0.011164
IBM RTG_03HrsWithaferin A5	WithaferinA	RTG	3	5	49.784	50.216	1.9945	3	0.011515
IBM RTG_04.5HrsWithaferin A5	WithaferinA	RTG	4.5	5	47.578	52.422	2.0621	3	0.011906
IBM RTG_06HrsWithaferin A5	WithaferinA	RTG	6	5	49.023	50.977	2.0861	3	0.012044
IBM RTG_07.5HrsWithaferin A5	WithaferinA	RTG	7.5	5	48.46	51.54	2.182	3	0.012598
IBM RTG_09HrsWithaferin A5	WithaferinA	RTG	9	5	48.195	51.805	2.1778	3	0.012573
IBM RTG_10.5HrsWithaferin A5	WithaferinA	RTG	10.5	5	47.509	52.491	2.0495	3	0.011833
IBM RTG_12HrsWithaferin A5	WithaferinA	RTG	12	5	46.974	53.026	2.1179	3	0.012228
IBM RTG_18HrsWithaferin A5	WithaferinA	RTG	18	5	41.493	58.507	2.1242	3	0.012264
IBM RTG_24HrsWithaferin A5	WithaferinA	RTG	24	5	40.559	59.441	2.4004	3	0.013859
