# Supplementary material for: The transcriptomic response of cells to a drug combination is more than the sum of the responses to the monotherapies
Source: eLife. 2020 Sep 18;9:e52707. doi: 10.7554/eLife.52707 (PMC7546737; doi:10.7554/eLife.52707)
Supplement: Supplementary file 4. [file elife-52707-supp4.xlsx]

## Sheet: Combinations
Viability Assay	Hours	Drug1	Drug1Conc	Drug1_NPI	Drug 1 Viability	Drug1 StdDev	Drug2	Drug2Conc	Drug2_NPI	Drug 2 Viability	Drug2 StdDev	Predicted Inhibition	Predicted Viability	Observed Inhibition	Observed Viability	Observed Viability StdDev	Excess Over BLISS	Excess Over BLISS Error
CTG	0	Mefloquine	10	4.9	95.1	1.5	Withaferin A	5	1.7	98.3	1.9	6.5	93.5	1.9	98.1		-4.6	2.2
CTG	3	Mefloquine	10	3.2	96.8	3.2	Withaferin A	5	1.9	98.1	1.6	5	95	2.2	97.8		-2.9	2.1
CTG	6	Mefloquine	10	6.2	93.8	3.4	Withaferin A	5	-3	103	4.5	3.4	96.6	0.1	99.9		-3.3	4.3
CTG	9	Mefloquine	10	8.1	91.9	3.8	Withaferin A	5	7.1	92.9	2.9	14.6	85.4	3.6	96.4		-11	3
CTG	12	Mefloquine	10	10.2	89.8	3	Withaferin A	5	7.9	92.1	7	17.3	82.7	8.7	91.3		-8.7	4.4
CTG	24	Mefloquine	10	16.2	83.8	0.6	Withaferin A	5	17.4	82.6	1.3	30.7	69.3	23.7	76.3		-7.1	1.4
CTG	0	Tamoxifen	20	4.7	95.3	2.2	Mefloquine	10	4.9	95.1	1.5	9.3	90.7	3.1	96.9		-6.2	2
CTG	3	Tamoxifen	20	8.3	91.7	2.6	Mefloquine	10	3.2	96.8	3.2	11.2	88.8	6.2	93.8		-5	2.3
CTG	6	Tamoxifen	20	9	91	3.8	Mefloquine	10	6.2	93.8	3.4	14.6	85.4	9.8	90.2		-4.8	3.7
CTG	9	Tamoxifen	20	14.2	85.8	2.9	Mefloquine	10	8.1	91.9	3.8	21.2	78.8	0.1	99.9		-21	3.2
CTG	12	Tamoxifen	20	13.6	86.4	4.2	Mefloquine	10	10.2	89.8	3	22.4	77.6	27.4	72.6		5	4.3
CTG	24	Tamoxifen	20	22	78	1.9	Mefloquine	10	16.2	83.8	0.6	34.7	65.3	55.3	44.7		20.6	2.8
CTG	0	Tamoxifen	20	4.7	95.3	2.2	Withaferin A	5	1.7	98.3	1.9	6.3	93.7	4.8	95.2		-1.5	2
CTG	3	Tamoxifen	20	8.3	91.7	2.6	Withaferin A	5	1.9	98.1	1.6	10	90	9	91		-1.1	1.8
CTG	6	Tamoxifen	20	9	91	3.8	Withaferin A	5	-3	103	4.5	6.2	93.8	9.5	90.5		3.3	4.2
CTG	9	Tamoxifen	20	14.2	85.8	2.9	Withaferin A	5	7.1	92.9	2.9	20.3	79.7	6.3	93.7		-14	2.4
CTG	12	Tamoxifen	20	13.6	86.4	4.2	Withaferin A	5	7.9	92.1	7	20.4	79.6	12.7	87.3		-7.7	4.5
CTG	24	Tamoxifen	20	22	78	1.9	Withaferin A	5	17.4	82.6	1.3	35.6	64.4	30.9	69.1		-4.6	1.5
CTG	0	Tamoxifen - Mefloquine	20 - 10	3.1	96.9	2.4	Withaferin A	5	1.7	98.3	1.9	4.8	95.2	1.6	98.4		-3.2	1.9
CTG	3	Tamoxifen - Mefloquine	20 - 10	6.2	93.8	0.7	Withaferin A	5	1.9	98.1	1.6	8	92	-1.9	101.9		-9.9	1
CTG	6	Tamoxifen - Mefloquine	20 - 10	9.8	90.2	4.3	Withaferin A	5	-3	103	4.5	7.1	92.9	13.8	86.2		6.7	3.7
CTG	9	Tamoxifen - Mefloquine	20 - 10	0.1	99.9	3.7	Withaferin A	5	7.1	92.9	2.9	7.2	92.8	3.8	96.2		-3.4	2.7
CTG	12	Tamoxifen - Mefloquine	20 - 10	27.4	72.6	5.8	Withaferin A	5	7.9	92.1	7	33.1	66.9	31.7	68.3		-1.4	4.3
CTG	24	Tamoxifen - Mefloquine	20 - 10	55.3	44.7	4.7	Withaferin A	5	17.4	82.6	1.3	63	37	82.8	17.2		19.7	3.7
InCell	0	Mefloquine	10	-27.7	127.7	5.7	Withaferin A	5	-16.5	116.5	11	-48.8	148.8	-30.1	130.1	14.1908	18.7	12.2
InCell	3	Mefloquine	10	46.1	53.9	7.7	Withaferin A	5	-25.3	125.3	11.1	32.5	67.5	34.2	65.8	10.1267	1.7	8.8
InCell	6	Mefloquine	10	22.3	77.7	5.8	Withaferin A	5	-25.2	125.2	7	2.8	97.2	19.6	80.4	12.4173	16.9	8.9
InCell	9	Mefloquine	10	6.7	93.3	15.3	Withaferin A	5	-41.2	141.2	15.6	-31.7	131.7	-28.3	128.3	1.75824	3.4	15.1
InCell	12	Mefloquine	10	2.2	97.8	9.7	Withaferin A	5	-17.7	117.7	16.3	-15	115	-22.3	122.3	11.4865	-7.3	13.1
InCell	24	Mefloquine	10	7.3	92.7	8.3	Withaferin A	5	10	90	3.6	16.6	83.4	19.4	80.6	3.77592	2.8	5.2
InCell	0	Tamoxifen	20	-30.3	130.3	13.5	Mefloquine	10	-27.7	127.7	5.7	-66.4	166.4	-45.7	145.7	21.5848	20.7	16.5
InCell	3	Tamoxifen	20	8.2	91.8	4	Mefloquine	10	46.1	53.9	7.7	50.5	49.5	74.5	25.5	6.25844	24	5.6
InCell	6	Tamoxifen	20	3.5	96.5	11.2	Mefloquine	10	22.3	77.7	5.8	25.1	74.9	72.2	27.8	6.99132	47.1	7.2
InCell	9	Tamoxifen	20	-6.2	106.2	11.8	Mefloquine	10	6.7	93.3	15.3	1	99	42.4	57.6	4.7823	41.5	11.7
InCell	12	Tamoxifen	20	1.9	98.1	10.7	Mefloquine	10	2.2	97.8	9.7	4.1	95.9	48.9	51.1	6.59584	44.8	9
InCell	24	Tamoxifen	20	17.8	82.2	7.7	Mefloquine	10	7.3	92.7	8.3	23.8	76.2	83.4	16.6	1.83132	59.6	5.8
InCell	0	Tamoxifen	20	-30.3	130.3	13.5	Withaferin A	5	-16.5	116.5	11	-51.8	151.8	-25.2	125.2	11.9475	26.6	14.1
InCell	3	Tamoxifen	20	8.2	91.8	4	Withaferin A	5	-25.3	125.3	11.1	-15	115	-1.5	101.5	6.59112	13.6	7.6
InCell	6	Tamoxifen	20	3.5	96.5	11.2	Withaferin A	5	-25.2	125.2	7	-20.8	120.8	4.4	95.6	3.67263	25.2	9.2
InCell	9	Tamoxifen	20	-6.2	106.2	11.8	Withaferin A	5	-41.2	141.2	15.6	-49.9	149.9	-12.8	112.8	8.68989	37	14.5
InCell	12	Tamoxifen	20	1.9	98.1	10.7	Withaferin A	5	-17.7	117.7	16.3	-15.4	115.4	-5.3	105.3	2.47441	10.1	11.8
InCell	24	Tamoxifen	20	17.8	82.2	7.7	Withaferin A	5	10	90	3.6	26	74	27.6	72.4	2.78352	1.6	4.6
InCell	0	Tamoxifen - Mefloquine	20 - 10	-45.7	145.7	21.6	Withaferin A	5	-16.5	116.5	11	-69.8	169.8	-16.2	116.2		53.6	19.4
InCell	3	Tamoxifen - Mefloquine	20 - 10	74.5	25.5	6.3	Withaferin A	5	-25.3	125.3	11.1	68.1	31.9	57.8	42.2		-10.3	8.2
InCell	6	Tamoxifen - Mefloquine	20 - 10	72.2	27.8	7	Withaferin A	5	-25.2	125.2	7	65.2	34.8	63.3	36.7		-1.8	5.7
InCell	9	Tamoxifen - Mefloquine	20 - 10	42.4	57.6	4.8	Withaferin A	5	-41.2	141.2	15.6	18.7	81.3	27.6	72.4		8.9	6.8
InCell	12	Tamoxifen - Mefloquine	20 - 10	48.9	51.1	6.6	Withaferin A	5	-17.7	117.7	16.3	39.9	60.1	45	55		5.1	7.5
InCell	24	Tamoxifen - Mefloquine	20 - 10	83.4	16.6	1.8	Withaferin A	5	10	90	3.6	85.1	14.9	98.3	1.7		13.3	1.1
