# Supplementary material for: The transcriptomic response of cells to a drug combination is more than the sum of the responses to the monotherapies
Source: eLife. 2020 Sep 18;9:e52707. doi: 10.7554/eLife.52707 (PMC7546737; doi:10.7554/eLife.52707)
Supplement: Supplementary file 5. [file elife-52707-supp5.xlsx]

## Sheet: Mefloquine vs. Tamoxifen
														All at 48 hours. CTG measurements
									Drug1	Drug1Conc	Drug1_NPI	Drug2	Drug2Conc	Drug2_NPI	Sci_WellID	PredictedInhibition	ObservedInhibition	Excess Over BLISS	Excess Over BLISS Error	Excess Over BLISS Error Percent
									Mefloquine	7.52	23.5	Tamoxifen	50	99.3	E8	99.5	99.3	-0.2	1.174	674
									Mefloquine	7.52	23.5	Tamoxifen	40	99.6	H6	99.7	99.2	-0.5	1.2107	229.49
									Mefloquine	7.52	23.5	Tamoxifen	20	48.8	G8	60.8	96.7	35.9	4.1909	11.683
									Mefloquine	7.52	23.5	Tamoxifen	10	13.9	G6	34.1	52.5	18.4	3.9082	21.231
									Mefloquine	7.52	23.5	Tamoxifen	5	1.1	E11	24.3	35.4	11.1	2.6564	23.907
									Mefloquine	7.52	23.5	Tamoxifen	1	-2.9	G9	21.3	25.4	4.1	1.9308	47.234
									Mefloquine	4	7	Tamoxifen	50	99.3	C7	99.4	99.4	0	1.0904	5119.2
									Mefloquine	4	7	Tamoxifen	40	99.6	E5	99.6	99.3	-0.3	1.1161	418.38
									Mefloquine	4	7	Tamoxifen	20	48.8	B5	52.4	63	10.6	4.237	39.801
									Mefloquine	4	7	Tamoxifen	10	13.9	G1	20	30.6	10.7	3.3034	30.955
									Mefloquine	4	7	Tamoxifen	5	1.1	H3	8	13.1	5	3.8468	76.301
									Mefloquine	4	7	Tamoxifen	1	-2.9	G2	4.4	4.1	-0.3	4.2287	1651.6
									Mefloquine	20	96.1	Tamoxifen	50	99.3	G12	100	99.4	-0.6	1.7783	320.14
									Mefloquine	20	96.1	Tamoxifen	40	99.6	G5	100	99.5	-0.5	1.7997	337.48
									Mefloquine	20	96.1	Tamoxifen	20	48.8	E6	98	99.3	1.3	5.3725	417.16
									Mefloquine	20	96.1	Tamoxifen	10	13.9	H8	96.7	99.2	2.5	4.5588	179.19
									Mefloquine	20	96.1	Tamoxifen	5	1.1	F8	96.2	99.3	3.1	3.3683	107.83
									Mefloquine	20	96.1	Tamoxifen	1	-2.9	E12	96	98.7	2.7	2.5156	92.6
									Mefloquine	2	5.5	Tamoxifen	50	99.3	B11	99.4	99.4	0	2.2397	317590
									Mefloquine	2	5.5	Tamoxifen	40	99.6	D1	99.6	99.4	-0.2	2.2552	1108.2
									Mefloquine	2	5.5	Tamoxifen	20	48.8	A11	51.6	52.4	0.8	4.2914	507.31
									Mefloquine	2	5.5	Tamoxifen	10	13.9	C3	18.7	27.7	9.1	3.6734	40.435
									Mefloquine	2	5.5	Tamoxifen	5	1.1	D5	6.5	11.1	4.6	3.9457	86.301
									Mefloquine	2	5.5	Tamoxifen	1	-2.9	D7	2.8	-0.3	-3.1	5.0611	164.86
									Mefloquine	15	55.2	Tamoxifen	50	99.3	D9	99.7	99.2	-0.5	2.9838	623.13
									Mefloquine	15	55.2	Tamoxifen	40	99.6	H11	99.8	99.8	0	2.9919	18218
									Mefloquine	15	55.2	Tamoxifen	20	48.8	F6	77	99.3	22.3	4.8767	21.899
									Mefloquine	15	55.2	Tamoxifen	10	13.9	H10	61.4	98.8	37.3	4.1948	11.232
									Mefloquine	15	55.2	Tamoxifen	5	1.1	D2	55.7	89.6	33.9	4.0824	12.026
									Mefloquine	15	55.2	Tamoxifen	1	-2.9	A7	53.9	63.4	9.5	4.7784	50.395
									Mefloquine	10	20.1	Tamoxifen	50	99.3	C8	99.5	99.4	-0.1	6.4341	6244.5
									Mefloquine	10	20.1	Tamoxifen	40	99.6	H12	99.7	99.4	-0.3	6.4483	2441.3
									Mefloquine	10	20.1	Tamoxifen	20	48.8	D3	59.1	98.9	39.9	6.3543	15.944
									Mefloquine	10	20.1	Tamoxifen	10	13.9	H4	31.2	60.6	29.4	8.4962	28.898
									Mefloquine	10	20.1	Tamoxifen	5	1.1	G11	21	47.8	26.8	6.8093	25.414
									Mefloquine	10	20.1	Tamoxifen	1	-2.9	B8	17.8	31.5	13.6	5.8355	42.829

## Sheet: Mefloquine vs Withaferin A
														All at 48 hours. CTG measurements
									Drug1	Drug1Conc	Drug1_NPI	Drug2	Drug2Conc	Drug2_NPI	Sci_WellID	PredictedInhibition	ObservedInhibition	Excess Over BLISS	Excess Over BLISS Error	Excess Over BLISS Error Percent
									Mefloquine	7.52	6.9	Withaferin A	10	90	B3	90.7	97	6.3	6.8434	108.89
									Mefloquine	7.52	6.9	Withaferin A	7.52	71.1	A7	73.1	72.2	-0.9	7.5752	887.03
									Mefloquine	7.52	6.9	Withaferin A	6	53.4	D2	56.7	54.5	-2.1	6.0512	285.19
									Mefloquine	7.52	6.9	Withaferin A	5	48.7	F7	52.2	50.3	-2	6.813	346.76
									Mefloquine	7.52	6.9	Withaferin A	1	1.2	D10	8.1	19	11	6.639	60.458
									Mefloquine	7.52	6.9	Withaferin A	0.25	6.3	A2	12.8	14.3	1.5	5.4335	352.91
									Mefloquine	4	8.9	Withaferin A	10	90	D5	90.9	86.8	-4.2	2.6546	63.679
									Mefloquine	4	8.9	Withaferin A	7.52	71.1	D4	73.6	65.7	-8	2.1167	26.594
									Mefloquine	4	8.9	Withaferin A	6	53.4	H1	57.6	52.3	-5.3	2.4301	45.917
									Mefloquine	4	8.9	Withaferin A	5	48.7	H3	53.2	51.7	-1.5	4.1702	274.26
									Mefloquine	4	8.9	Withaferin A	1	1.2	E11	10	17.7	7.7	4.7127	61.161
									Mefloquine	4	8.9	Withaferin A	0.25	6.3	F1	14.7	9.3	-5.3	7.6724	143.98
									Mefloquine	20	71.9	Withaferin A	10	90	B1	97.2	99.2	2	8.2108	413.05
									Mefloquine	20	71.9	Withaferin A	7.52	71.1	A11	91.9	99.3	7.5	7.5357	100.95
									Mefloquine	20	71.9	Withaferin A	6	53.4	E8	86.9	98.6	11.8	7.1838	61.122
									Mefloquine	20	71.9	Withaferin A	5	48.7	C1	85.6	99	13.5	8.2225	60.939
									Mefloquine	20	71.9	Withaferin A	1	1.2	D8	72.2	77.9	5.7	9.4175	166.46
									Mefloquine	20	71.9	Withaferin A	0.25	6.3	C11	73.6	75.8	2.2	8.5104	393.71
									Mefloquine	2	1.7	Withaferin A	10	90	B11	90.2	92.9	2.7	6.8047	253.97
									Mefloquine	2	1.7	Withaferin A	7.52	71.1	G1	71.6	64.1	-7.5	7.5053	100.24
									Mefloquine	2	1.7	Withaferin A	6	53.4	F9	54.2	52.8	-1.5	5.9807	411.84
									Mefloquine	2	1.7	Withaferin A	5	48.7	D11	49.6	48.9	-0.7	6.9435	1014.7
									Mefloquine	2	1.7	Withaferin A	1	1.2	G2	2.9	15.4	12.5	7.1829	57.642
									Mefloquine	2	1.7	Withaferin A	0.25	6.3	B10	7.9	7.1	-0.8	6.0743	722.81
									Mefloquine	15	44.5	Withaferin A	10	90	D9	94.5	98.7	4.2	3.3507	78.982
									Mefloquine	15	44.5	Withaferin A	7.52	71.1	C7	83.9	95.5	11.6	3.4429	29.661
									Mefloquine	15	44.5	Withaferin A	6	53.4	A10	74.1	91	16.9	4.3157	25.566
									Mefloquine	15	44.5	Withaferin A	5	48.7	C3	71.5	76.4	4.9	5.0306	103.47
									Mefloquine	15	44.5	Withaferin A	1	1.2	D3	45.1	48.3	3.1	4.8487	155.67
									Mefloquine	15	44.5	Withaferin A	0.25	6.3	H8	48	41.4	-6.6	4.4534	67.52
									Mefloquine	10	16.2	Withaferin A	10	90	C6	91.6	98	6.3	5.6515	89.084
									Mefloquine	10	16.2	Withaferin A	7.52	71.1	E10	75.8	82	6.2	5.4165	86.92
									Mefloquine	10	16.2	Withaferin A	6	53.4	F8	61	55.9	-5.1	5.0291	99.119
									Mefloquine	10	16.2	Withaferin A	5	48.7	H9	57	53.1	-3.8	6.1018	158.83
									Mefloquine	10	16.2	Withaferin A	1	1.2	E5	17.2	33.5	16.2	5.5031	33.881
									Mefloquine	10	16.2	Withaferin A	0.25	6.3	B7	21.5	25	3.5	4.4807	128.4

## Sheet: Tamoxifen vs. Withaferin A
														All at 48 hours. CTG measurements
									Drug1	Drug1Conc	Drug1_NPI	Drug2	Drug2Conc	Drug2_NPI	Sci_WellID	PredictedInhibition	ObservedInhibition	Excess Over BLISS	Excess Over BLISS Error	Excess Over BLISS Error Percent
									Tamoxifen	5	5.6	Withaferin A	10	90	A12	90.6	91.7	1.1	3.2332	290.75
									Tamoxifen	5	5.6	Withaferin A	7.52	71.1	C12	72.7	64.5	-8.2	2.227	27.259
									Tamoxifen	5	5.6	Withaferin A	6	53.4	H12	56.1	52.4	-3.6	4.4337	121.85
									Tamoxifen	5	5.6	Withaferin A	5	48.7	E6	51.6	51	-0.6	4.2861	763.66
									Tamoxifen	5	5.6	Withaferin A	1	1.2	C4	6.8	12.9	6.2	4.1185	66.617
									Tamoxifen	5	5.6	Withaferin A	0.25	6.3	F4	11.6	9.5	-2.1	3.2712	154.23
									Tamoxifen	30	58.7	Withaferin A	10	90	H11	95.9	98.1	2.2	3.6659	165.79
									Tamoxifen	30	58.7	Withaferin A	7.52	71.1	F6	88	98.3	10.3	3.3684	32.761
									Tamoxifen	30	58.7	Withaferin A	6	53.4	E2	80.8	98.4	17.6	3.5195	19.974
									Tamoxifen	30	58.7	Withaferin A	5	48.7	F2	78.8	97.2	18.4	5.2856	28.665
									Tamoxifen	30	58.7	Withaferin A	1	1.2	E9	59.2	61.8	2.6	6.9138	261.31
									Tamoxifen	30	58.7	Withaferin A	0.25	6.3	B6	61.3	55.2	-6.1	3.0909	50.882
									Tamoxifen	25	44.6	Withaferin A	10	90	A6	94.5	99.3	4.8	4.7446	98.719
									Tamoxifen	25	44.6	Withaferin A	7.52	71.1	C2	84	98.6	14.6	4.3886	29.968
									Tamoxifen	25	44.6	Withaferin A	6	53.4	D12	74.2	95.9	21.7	4.3802	20.189
									Tamoxifen	25	44.6	Withaferin A	5	48.7	G6	71.5	80.5	9	6.8286	76.089
									Tamoxifen	25	44.6	Withaferin A	1	1.2	G9	45.2	49.3	4	5.9462	147.39
									Tamoxifen	25	44.6	Withaferin A	0.25	6.3	E12	48.1	43.5	-4.6	4.1714	90.537
									Tamoxifen	20	37.2	Withaferin A	10	90	G4	93.7	98.4	4.7	4.2818	91.768
									Tamoxifen	20	37.2	Withaferin A	7.52	71.1	B5	81.8	92.2	10.4	4.2553	41.026
									Tamoxifen	20	37.2	Withaferin A	6	53.4	F11	70.8	78.4	7.6	5.4591	71.877
									Tamoxifen	20	37.2	Withaferin A	5	48.7	H6	67.8	60.1	-7.7	6.915	89.708
									Tamoxifen	20	37.2	Withaferin A	1	1.2	G12	38	41.5	3.6	5.4126	151.36
									Tamoxifen	20	37.2	Withaferin A	0.25	6.3	E4	41.2	38	-3.2	3.2256	102.19
									Tamoxifen	10	8.8	Withaferin A	10	90	B4	90.9	96.2	5.3	10.997	207.51
									Tamoxifen	10	8.8	Withaferin A	7.52	71.1	F5	73.6	75.7	2.1	10.073	481.46
									Tamoxifen	10	8.8	Withaferin A	6	53.4	H4	57.5	51.7	-5.8	9.6101	165.58
									Tamoxifen	10	8.8	Withaferin A	5	48.7	H7	53.2	48.9	-4.2	9.8927	233.34
									Tamoxifen	10	8.8	Withaferin A	1	1.2	G8	9.9	27.1	17.2	9.162	53.256
									Tamoxifen	10	8.8	Withaferin A	0.25	6.3	G7	14.5	18	3.5	8.4654	244.86
									Tamoxifen	1	-2	Withaferin A	10	90	G10	89.8	91.6	1.8	4.0067	224.82
									Tamoxifen	1	-2	Withaferin A	7.52	71.1	G11	70.5	66.3	-4.1	4.043	97.537
									Tamoxifen	1	-2	Withaferin A	6	53.4	H2	52.5	52	-0.5	3.7237	790.27
									Tamoxifen	1	-2	Withaferin A	5	48.7	E1	47.6	46.8	-0.8	5.4803	670.32
									Tamoxifen	1	-2	Withaferin A	1	1.2	C9	-0.8	11.3	12.1	5.17	42.709
									Tamoxifen	1	-2	Withaferin A	0.25	6.3	C10	4.4	2.9	-1.5	3.1694	215.43
